# Supplementary material for: Changes in weight, body composition and metabolic parameters after switch to dolutegravir/lamivudine compared with continued treatment with dolutegravir/abacavir/lamivudine for virologically suppressed HIV infection (The AVERTAS trial): a randomised, open-label, superiority trial in Copenhagen, Denmark
Source: PubMed Central journal article supplement — BMJ Open. 2023 Aug 21;13(8):e075673. doi: 10.1136/bmjopen-2023-075673 (PMC10445393; doi:10.1136/bmjopen-2023-075673), 2023-08-21
Supplement: bmjopen-2023-075673.draft_revisions.pdf [file bmjopen-2023-075673.draft_revisions.pdf]

# BMJ Open

BMJ Open is committed to open peer review. As part of this commitment we make the peer review history of every article we publish publicly available.

When an article is published we post the peer reviewers' comments and the authors' responses online. We also post the versions of the paper that were used during peer review. These are the versions that the peer review comments apply to.

The versions of the paper that follow are the versions that were submitted during the peer review process. They are not the versions of record or the final published versions. They should not be cited or distributed as the published version of this manuscript.

BMJ Open is an open access journal and the full, final, typeset and author-corrected version of record of the manuscript is available on our site with no access controls, subscription charges or pay-per-view fees (<http://bmjopen.bmj.com>).

If you have any questions on BMJ Open's open peer review process please email [info.bmjopen@bmj.com](mailto:info.bmjopen@bmj.com)

# BMJ Open

**Changes in weight, body composition and metabolic parameters after switch to dolutegravir/lamivudine compared to continued treatment with dolutegravir/abacavir/lamivudine for virologically suppressed HIV infection:  
A randomized open-label superiority trial - The AVERTAS trial**

|                               |                                                                                                                                                                                                                                                                                                                                                                                                                                                                                                                                                                                                                                                                                                                                                                                                                                                                                                                                                                                                                                                                     |
|-------------------------------|---------------------------------------------------------------------------------------------------------------------------------------------------------------------------------------------------------------------------------------------------------------------------------------------------------------------------------------------------------------------------------------------------------------------------------------------------------------------------------------------------------------------------------------------------------------------------------------------------------------------------------------------------------------------------------------------------------------------------------------------------------------------------------------------------------------------------------------------------------------------------------------------------------------------------------------------------------------------------------------------------------------------------------------------------------------------|
| Journal:                      | <i>BMJ Open</i>                                                                                                                                                                                                                                                                                                                                                                                                                                                                                                                                                                                                                                                                                                                                                                                                                                                                                                                                                                                                                                                     |
| Manuscript ID                 | bmjopen-2023-075673                                                                                                                                                                                                                                                                                                                                                                                                                                                                                                                                                                                                                                                                                                                                                                                                                                                                                                                                                                                                                                                 |
| Article Type:                 | Protocol                                                                                                                                                                                                                                                                                                                                                                                                                                                                                                                                                                                                                                                                                                                                                                                                                                                                                                                                                                                                                                                            |
| Date Submitted by the Author: | 15-May-2023                                                                                                                                                                                                                                                                                                                                                                                                                                                                                                                                                                                                                                                                                                                                                                                                                                                                                                                                                                                                                                                         |
| Complete List of Authors:     | <p>Pedersen, Karen; Hvidovre Hospital, Department of Infectious Diseases<br/>           Knudsen, Andreas; Bispebjerg Hospital, Department of Respiratory medicine and infectious diseases, Copenhagen University Hospital – Bispebjerg<br/>           Møller, Søren ; University of Copenhagen, Clinical Medicine; Hvidovre Hospital Funktions- og Billeddiagnostisk Enhed<br/>           Siebner, Hartwig; Hvidovre Hospital MRI Research Section, Danish Research Centre for Magnetic Resonance, Center for Functional and Diagnostic Imaging and Research; University of Copenhagen Faculty of Health and Medical Sciences, Department of Neurology<br/>           Hove, Jens; Hvidovre Hospital, Department of Cardiology; University of Copenhagen, Center of Functional Imaging and Research,<br/>           Gerstoft, Jan; Rigshospitalet, Department of Infectious Diseases; University of Copenhagen<br/>           Benfield, Thomas ; Hvidovre Hospital, Department of Infectious Diseases; University of Copenhagen, Department of Clinical Medicine</p> |
| Keywords:                     | Obesity, HIV & AIDS < INFECTIOUS DISEASES, INFECTIOUS DISEASES, VIROLOGY                                                                                                                                                                                                                                                                                                                                                                                                                                                                                                                                                                                                                                                                                                                                                                                                                                                                                                                                                                                            |
|                               |                                                                                                                                                                                                                                                                                                                                                                                                                                                                                                                                                                                                                                                                                                                                                                                                                                                                                                                                                                                                                                                                     |

SCHOLARONE™  
Manuscripts

**TITLE**

Changes in weight, body composition and metabolic parameters after switch to dolutegravir/lamivudine compared to continued treatment with dolutegravir/abacavir/lamivudine for virologically suppressed HIV infection:

A randomized open-label superiority trial - The AVERTAS trial

Karen Brorup Heje Pedersen<sup>1</sup>, Andreas Knudsen<sup>2</sup>, Søren Møller<sup>3,4</sup>, Hartwig Roman Siebner<sup>3,5</sup>, Jens Dahlgaard Hove<sup>3,6</sup>, Jan Gerstoff<sup>7</sup> and Thomas Benfield<sup>1,3</sup>

<sup>1</sup>Departments of Infectious diseases, <sup>4</sup>Clinical Physiology and Nuclear Medicine, <sup>5</sup>Danish Research Centre for Magnetic Resonance, and <sup>6</sup>Cardiology, Copenhagen University Hospital – Amager and Hvidovre

Kettegaard Allé 30, DK-2650 Hvidovre, Denmark

<sup>2</sup> Department of Respiratory medicine and infectious diseases, Copenhagen University Hospital – Bispebjerg

Bispebjerg Bakke 23, DK-2400 Copenhagen, Denmark

<sup>3</sup> Department of Clinical Medicine, Faculty of Health and Medical Sciences, University of Copenhagen, Blegdamsvej 3B, 2200 Copenhagen N, Denmark

<sup>7</sup> Department of Infectious Diseases, Copenhagen University Hospital – Rigshospitalet

Blegdamsvej 9, DK-2100 Copenhagen, Denmark

## Registration

Protocol version: Awaiting amendment approval, protocol version 9.0 April 04, 2023

Ethics Committee of the Capital Region, Denmark (H-20011433)

Danish Medicines Agency (EudraCT no. 2019-004999-19)

Regional Data Protection Centre (P-2020-207)

clinicaltrials.gov (NCT04904406)

## Roles and Responsibility

Corresponding author

Karen Brorup Heje Pedersen, MD

Department of Infectious diseases, Copenhagen University Hospital – Amager and Hvidovre

Kettegaard Allé 30, DK-2650 Hvidovre, Denmark

[karen.brorup.heje.pedersen@regionh.dk](mailto:karen.brorup.heje.pedersen@regionh.dk)

Sponsor

Thomas Benfield, MD, DMSc, professor

Department of Infectious diseases, Copenhagen University Hospital – Amager and Hvidovre

Kettegaard Allé 30, DK-2650 Hvidovre, Denmark

[thomas.lars.benfield@regionh.dk](mailto:thomas.lars.benfield@regionh.dk)

1  
2  
3  
4  
5  
6  
7  
8  
9  
10  
11  
12  
13  
14  
15  
16  
17  
18  
19  
20  
21  
22  
23  
24  
25  
26  
27  
28  
29  
30  
31  
32  
33  
34  
35  
36  
37  
38  
39  
40  
41  
42  
43  
44  
45  
46  
47  
48  
49  
50  
51  
52  
53  
54  
55  
56  
57  
58  
59  
60

## Role of Sponsor and Funding

The study is a Sponsor-Investigator trial. The sponsor, Thomas Benfield has no conflicts of interest or commercial interest in the study. This work was supported by the Simonsen's Foundation and from Amager and Hvidovre Hospital's Research Foundation. Sponsor and investigators are independent of economic or competing interests. The grant is held in a foundation account managed by sponsor. Participants will not be financially compensated. Study results will be utilized only for scientific and public purpose and do not hold any commercial significance.

## Word Count

2887

## Key Words

Randomized controlled trial, RCT, HIV, antiretroviral therapy, weight, obesity, cardiovascular disease, Cardiac Magnetic Resonance, CMRI

## Abstract

### Introduction

With longer life expectancy in people living with HIV (PLWH) on antiretroviral therapy, cardiovascular disease (CVD) has become a common cause of mortality. Abacavir has been associated with an increased risk of myocardial infarction, but the mechanism is unknown. Additionally, abacavir may be obesogenic which could mediate an additional risk factor of CVD. We aim to investigate if discontinuation of abacavir will have a favorable impact on body weight and cardiac parameters in PLWH.

### Methods and Analysis

Randomized, controlled, superiority trial of virologically suppressed PLWH on dolutegravir, abacavir and lamivudine (DTG/ABC/3TC) for  $\geq 6$  months. In total, 84 PLWH will be randomized 1:2 to either continue DTG/ABC/3TC or to switch to dolutegravir and lamivudine (DTG/3TC) providing the power of 90% at alpha 5% to detect a mean difference in weight change of 2 kg ( $\Delta$ ) given a variance of 2.7 kg. Follow-up will be 48 weeks. Data will be collected at baseline and week 48. Primary outcome will be change in bodyweight from baseline to week 48 measured as difference between means in the two study arms. Secondary outcomes will be changes in cardiac-, inflammatory- and metabolic parameters, fat distribution, coagulation, endothelial, platelet function, quality of life and virological control from baseline to week 48. Measurements include computed tomography (CT) of thorax and abdomen, external carotid artery ultrasound, liver elastography and dual energy x-ray absorptiometry (DEXA) and blood analysis. Plasma HIV RNA will be measured at baseline, week 4, 24 and 48. Forty participants (20 from each arm) will be included in a sub-study involving cardiac magnetic resonance imaging at baseline and week 48. Twenty non-HIV-infected controls will be included with a single scan to compare with baseline scan data.

## Ethics and Dissemination

Result from this study will lead to a better understanding of the association between antiretroviral therapy and the impact on weight and risk of CVD. Findings will be useful for both clinicians and PLWH in the guidance of a more individualized HIV treatment. Results from the main study and the sub study will be submitted for publication into a peer-review journal(s). The AVERTAS study is approved by the Ethics Committee of the Capital Region, Denmark (H-20011433), Danish Medicines Agency (EudraCT no. 2019-004999-19) and Regional Data Protection Centre (P-2020-207). The study is registered at [clinicaltrials.gov](https://clinicaltrials.gov) (NCT04904406). Trial registration: ClinicalTrials.gov Identifier: NCT04904406, registered the 27th of May 2021.

## ARTICLE SUMMARY

### Strengths and Limitations

- Study design is randomized controlled multicenter trial which limits confounding
- The study is limited by the unblinded setting which enables bias
- The study is carried out in outpatient clinics, where participants receive their usual care.

This might enhance adherence to study visits

## INTRODUCTION

### Background and Rationale

The introduction of antiretroviral treatment (ART) with  $\geq 3$  drugs in 1996 changed the prognosis of HIV infection dramatically. Today, people living with HIV (PLWH) treated with ART has a life expectancy close to that of the HIV-uninfected population (1). However, this longer life expectancy has led to higher rates of serious non-AIDS events (SNAE) such as cardiovascular disease (CVD) (2–4). Today, CVD is the main cause of mortality in PLWH (5). The mechanism is thought to be a multifactorial interplay between traditional CVD risk factors, HIV specific factors and ART. Studies have shown a correlation between the use of the nucleoside reverse transcriptase inhibitor (NRTI) abacavir and myocardial infarction (6–10). The underlying mechanism remains largely unknown but may include endothelial dysfunction, increased inflammation, platelet activation and platelet/collagen interactions, all of which can modify CVD risk (11).

Initiating ART per se is associated with weight gain (12–14). Some of this weight gain is thought to be related to a “return-to-health” phenomenon where initiation of ART causes a return to baseline weight after HIV induced wasting. This mechanism is not fully understood and seems to be only partly responsible for the observed weight gain. A meta-analysis of 8 RCTs reported that weight increased more in ART-naïve PLWH initiating treatment with an integrase strand transfer inhibitor



1  
2  
3  
4 (INSTI)-based regimen as compared to a non-NRTI or a protease inhibitor based regimen (15).  
5  
6  
7 Among NRTIs, abacavir and tenofovir alafenamide (TAF), were associated with more weight gain  
8  
9 than tenofovir disoproxil fumarate (TDF) or zidovudine. Weight gain after ART switch is modest and  
10  
11 it remains uncertain whether this is due to the loss of a weight suppressive effect of prior regimens  
12  
13 with older agent such as TDF or efavirenz or a weight gain effect of the newer regimens especially  
14  
15 TAF and/or INSTI, or both (16). Overweight and obesity are associated with an increased risk of  
16  
17 metabolic syndrome, diabetes, hypertension and dyslipidaemia that converge as risk factors for CVD  
18  
19 including myocardial infarction (17). Thus, it is conceivable that there could be synergistic effects  
20  
21 and a higher overall risk of CVD using abacavir and dolutegravir in combination. We want to  
22  
23 investigate the effect on weight change and cardiac function after discontinuation of abacavir in  
24  
25 PLWH treated with abacavir, lamivudine and dolutegravir.  
26  
27  
28  
29  
30

## 31 Objectives

32  
33 The aim of this study is to investigate if discontinuing abacavir by switching from a 3-drug (3DR)  
34  
35 regimen with dolutegravir, abacavir and lamivudine (DTG/ABC/3TC) to a 2-drug (2DR) regimen with  
36  
37 dolutegravir and lamivudine (DTG/3TC) will decrease weight and improve metabolic and cardiac  
38  
39 parameters in PLWH.  
40  
41  
42  
43

## 44 Trial Design

45  
46 This study is a randomized, controlled, parallel, open-label, phase 4, interventional trial.  
47  
48  
49

## 50 METHODS: PARTICIPANT, INTERVENTIONS, AND OUTCOMES

### 51 Study Design

52  
53 Participants will be recruited from outpatient clinics at the departments of infectious diseases at two  
54  
55 Danish hospitals: Copenhagen University Hospital - Amager and Hvidovre; and Copenhagen  
56  
57  
58  
59  
60

University Hospital, Rigshospitalet. Both located in the Capital Region of Denmark. Study visits and data collection will be performed at Copenhagen University Hospital - Amager and Hvidovre.

## Eligibility Criteria

Inclusion and exclusion criteria are listed in Table 1.

**Table 1 Inclusion and Exclusion Criteria**

| Inclusion criteria                                                                                                                                                                                                                                                                                                                                                                                                  | Exclusion criteria                                                                                                                                                                                                                                                                                                                                            |
|---------------------------------------------------------------------------------------------------------------------------------------------------------------------------------------------------------------------------------------------------------------------------------------------------------------------------------------------------------------------------------------------------------------------|---------------------------------------------------------------------------------------------------------------------------------------------------------------------------------------------------------------------------------------------------------------------------------------------------------------------------------------------------------------|
| <ul style="list-style-type: none"> <li>Age <math>\geq</math> 18 years</li> <li>HIV infection</li> <li>ongoing treatment with DTG/ABC/3TC <math>\geq</math> 6 months</li> <li>Plasma viral load (HIV-RNA) <math>&lt;</math> 50 copies/ml at inclusion</li> </ul> <p>For women with childbearing potential</p> <ul style="list-style-type: none"> <li>Willingness to use contraceptive during study period</li> </ul> | <ul style="list-style-type: none"> <li>Pre-existing viral resistance to lamivudine or dolutegravir*</li> <li>Presence of hepatitis B antigen (HBsAg) or HBV DNA</li> <li>Cancer within the past five years</li> <li>Pregnancy or breastfeeding (for women)</li> <li>Unstable cardiovascular disease, diabetes (assessed by the treating physician)</li> </ul> |

Participants will be eligible for MRI sub study participation, if they comply to standard MRI safety guidelines.

\*Existing genotypic resistance test results will be screened prior to inclusion.

## INTERVENTIONS

At week 1 patients will be randomized to either continued therapy with co-formulated dolutegravir 50 mg, abacavir 600 mg, and lamivudine 300 mg (Triumeq, control arm) or switch to co-formulated dolutegravir 50 mg and lamivudine 300 mg (Dovato, intervention arm) for 48 weeks. See Figure 1 for participant timeline.

### Administration

The Investigational Medicinal Products (IMP) will be self-administered in original pharmaceutical packaging by participants once daily. Double controlled administration of the IMP and IMP-log registration will be performed by two designated and GCP-trained study personnel. The study IMP will be distributed at week 1 and week 24 in original wrapping, with a study specific label. All IMPs are authorized, registered, and marketed by the Danish Medicines Agency and the European Medicines Agency (EMA). Dosage and administration frequency are assigned according to treatment guidelines.

### Withdrawal from study

Participants will be withdrawn in case of viral rebound or in any other case of compromised participants safety assessed by the investigator. If patients drop out or are withdrawn, an immediate follow up meeting will be arranged to ensure return to their usual treatment and the treating clinician will be informed. Data will be collected at time of withdrawal with the patient's acceptance and used in the intention to treat analyses.

### Adherence

Adherence will be monitored by measurements of plasma HIV-RNA viral load at baseline, weeks 4 (2DR group only), 24 and 48. Virological failure defined as two consecutive viral loads > 50 copies/ml with an interval of 14 to 30 days will lead to immediate withdrawal from the study.

## OUTCOMES

### Primary outcome

- Change in bodyweight from baseline to week 48 measured as difference between means in the two study arms

### Secondary outcomes

- Development of metabolic syndrome at week 48 (18)
- Development of type 2 diabetes at week 48 (19)
- Impaired insulin resistance and/or  $\beta$ -cell function determined by changes in HOMA-IR at week 48 (20)
- Virological control at week 48 as defined by a plasma HIV-RNA  $<50$  copies/ml

### Changes from baseline to week 48 in:

- Self-rated health evaluated by 12-item Short Form Survey (SF-12)
- Framingham Risk Score (21,22)
- DAD CVD risk score (23)
- Blood HbA1c
- Total plasma cholesterol
- Plasma High Density lipoprotein cholesterol (HDL-cholesterol)
- Plasma Low Density Lipoprotein cholesterol (LDL-cholesterol)
- Plasma Very Low-Density Lipoprotein cholesterol (VLDL-cholesterol)
- Plasma Triglycerides
- Visceral adipose tissue (VAT) and subcutaneous adipose tissue (SAT) ratio (abdominal CT)

- 1  
2  
3  
4  
5  
6  
7  
8  
9  
10  
11  
12  
13  
14  
15  
16  
17  
18  
19  
20  
21  
22  
23  
24  
25  
26  
27  
28  
29  
30  
31  
32  
33  
34  
35  
36  
37  
38  
39  
40  
41  
42  
43  
44  
45  
46  
47  
48  
49  
50  
51  
52  
53  
54  
55  
56  
57  
58  
59  
60
- Fat distribution in trunk, limb, and extremities measured by Dual-Energy X-ray Absorption (DEXA)
  - Fatty infiltration of the liver evaluated as:
    - Development of steatosis or increase in existing steatosis from baseline (CT liver and Controlled Attenuated Parameter (CAP) (Fibroscan))
  - Blood pressure
  - Cardiac magnetic resonance imaging (MRI)
  - Carotid artery intima-media thickness (cIMT) measured by ultrasound
  - Coronary artery calcium score (CACs)
  - Plasma N-terminal pro-B-type natriuretic peptide (Pro-BNP)
  - Plasma Troponin T (TnT)
  - Inflammation:
    - Plasma High-sensitive C-reactive protein
    - Plasma Interleukin 1 $\beta$
    - Plasma Interleukin 6
  - Endothelial function:
    - Plasma Vascular cell adhesion molecule 1
    - Plasma Intercellular adhesion molecule 1
  - Platelet function:
    - Plasma Soluble P-selectin
    - Plasma Soluble glycoprotein VI.
  - Coagulation:
  - Plasma D-dimer

- Plasma coagulations factor 2, 7 and 10 (extrinsic pathway)
- Plasma Fibrinogen
- Blood hemoglobin, leucocyte count, and platelet count
- Plasma creatinine, urea, sodium, potassium, bilirubin, and alanine aminotransferase.

## OUTCOMES, MR-SUB STUDY

### Primary outcome

In the CMR sub-study the outcome is a composite endpoint of

- Decrease in extracellular myocardial volume (ECV) from baseline to week 48
- Decrease in left atrial volume from baseline to week 48
- Improvement in diastolic function from baseline to week 48
- Reduction in myocardial mass from baseline to week 48

### Secondary outcomes

Changes in

- Left ventricular ejection fraction
- Myocardial perfusion
- Myocardial edema/inflammation
- Myocardial fibrosis
- Myocardial lipid-water profile

## PARTICIPANT TIMELINE

Participant timeline is illustrated in Figure 1

## SAMPLE SIZE

Anticipated annual weight change in the two groups are: DTG/3TC + 0 to -1 kg and DTG/ABC/3TC +2 kg. Sample size is estimated by Student's unpaired t-test. Patients will be randomized 2:1 to intervention or control.

Assuming a 2:1 randomization ratio for the intervention and control arm, a significance level ( $\alpha$ ) of 5%, a power ( $\beta$ ) of 90%, mean difference in weight between the two arms of 2 kg ( $\Delta$ ) and a variance of 2.7 kg the estimated sample size required will be 60 randomized individuals in the intervention group and 30 randomized individuals in the control group. To account for a 5% withdrawal or dropout rate, sample size will be 95 patients in total

With a power of 80% the estimated sample size required will be 44 randomized individuals in the intervention group and 22 randomized individuals in the control group, plus 4 additional allowing a 5% dropout rate. Sample size will be 70 in total.

In this study we intend to include between 70-95 subject to ensure sufficient power.

## RECRUITMENT

Eligible patients will be identified by treating physicians at outpatient clinics at the involved sites. Information on eligible patients will be disclosed to the responsible investigator for the purpose of recruitment. Eligible patients will receive verbal and written study information, and subsequently be offered participation. All participants must provide written informed consent.

## METHODS: ASSIGNMENT OF INTERVENTIONS

### Allocation

Eligible participants will be randomized in two parallel arms with an allocation ratio of 2:1 to switch to 2DR therapy with DTG/3TC or to usual 3DR treatment with DTG/ABC/3TC (control). Key variables will be entered into a secure web-based program (REDCap) to randomize patients into two parallel arms upon inclusion. The randomization list will be centrally generated in REDCap using random blocks stratified by study center and sex. Additionally, 40 participants (20 control and 20 intervention) will be invited to participate in the cardiac MRI sub-study. The study will be open label, both participants and the study personnel will be un-blinded to randomization.

## METHODS: DATA COLLECTION, MANAGEMENT, AND ANALYSIS

### Data Collection Methods

Study visits and data collection will be performed at Copenhagen University Hospital - Amager and Hvidovre and participants will be examined by trained clinicians or study nurses. At the inclusion visit (week 1) baseline data will be collected, and participants will be randomized. Subsequently a safety blood test will be performed at week 4 (for the 2DR arm), and follow-up data will be collected at study visits at week 24 (range 20-28) and finally at week 48 (range 46-52). An overview data collection is listed in Table 2 and 3. Blood testing is listed in Table 4. Detailed description on radiological tests are included in Appendix 2.

Participants must be fasting at least 6 hours prior to visits at week 1, 24 and 48, to ensure fasting measurements of weight, blood tests, transient liver elastography and Dual-Energy X-Ray Absorptiometry.



1  
2  
3  
4  
5  
6  
7  
8  
9  
10  
11  
12  
13  
14  
15  
16  
17  
18  
19  
20  
21  
22  
23  
24  
25  
26  
27  
28  
29  
30  
31  
32  
33  
34  
35  
36  
37  
38  
39  
40  
41  
42  
43  
44  
45  
46  
47  
48  
49  
50  
51  
52  
53  
54  
55  
56  
57  
58  
59  
60**Table 2 Data Collection**

|                                                                | Week 1 | Week 4 | Week 24 | Week 48 |
|----------------------------------------------------------------|--------|--------|---------|---------|
| Informed consent                                               | x      |        |         |         |
| Randomization                                                  | x      |        |         |         |
| Demographics <sup>1</sup>                                      | x      |        |         |         |
| Framingham risk score                                          | x      |        | x       | x       |
| SF-12 <sup>2</sup>                                             | x      |        | x       | x       |
| Body weight                                                    | x      |        | x       | x       |
| Waist circumference                                            | x      |        | x       | x       |
| Vital signs                                                    | x      |        | x       | x       |
| Blood tests <sup>4</sup>                                       | x      |        | x       | x       |
| HIV safety blood tests <sup>5</sup>                            | x      | x      | x       | x       |
| Transient elastography / Controlled Attenuated Parameter (CAP) | x      |        | x       | x       |
| CT <sup>6</sup>                                                | (x)    |        | (x)     | (x)     |
| DEXA <sup>7</sup>                                              | x      |        | x       | x       |
| cIMT <sup>8</sup>                                              | x      |        | x       | x       |
| <b>MR SUB STUDY</b>                                            |        |        |         |         |
| Cardiac MRI <sup>9</sup>                                       | x      |        |         | x       |
| 24-hours ECG Holter monitoring                                 | x      |        |         | x       |

<sup>1</sup>Age, gender, tobacco use, alcohol consumption, medication, medical history, nursing home residency, and activities of daily living.

<sup>2</sup> 12-item short-form health survey (SF-12)

<sup>3</sup>Blood **pressure**, heart rate, respiration rate, peripheral oxygen saturation, temperature.

<sup>4</sup>**HIV safety blood tests**: Plasma HIV-RNA and CD4 count.

<sup>5</sup>**Blood tests**: leucocytes, platelets, hemoglobin, creatinine, urea, sodium, potassium, bilirubin, alanine aminotransferase, lactate dehydrogenase, erythrocyte fraction. **Metabolism**: Fasting p-glucose, insulin, glycated hemoglobin (HbA1c), total cholesterol, HDL, LDL, VLDL, triglyceride. **Inflammation**: High-sensitive c-reactive protein, interleukin 1 and 6. **Coagulation**: D-dimer, factor 2, 7 and 10, fibrinogen. **Platelet function**: soluble P-selectin, soluble glycoprotein VI. **Endothelial function**: Vascular cell adhesion molecule 1, intercellular adhesion molecule 1, Cardiac: N-terminal pro-B-type natriuretic peptide (Pro-BNP), troponin T (TnT).

<sup>6</sup>Low dose computed tomography of thorax and abdomen to determine coronary artery calcium score (CACs), visceral adipose tissue (VAT), subcutaneous adipose tissue (SAT) and liver steatosis.

<sup>7</sup>Dual energy x-ray absorptiometry, optional

<sup>8</sup>Carotid intima-media thickness (cIMT) determined by ultrasound.

<sup>9</sup>Cardiac magnetic resonance imaging sub study (optional).

**Table 3 Clinical Measurements and Methods**

| Measurements                                                         | Description                                                                                                                                                                                                                                                                                                                                                                                                    |
|----------------------------------------------------------------------|----------------------------------------------------------------------------------------------------------------------------------------------------------------------------------------------------------------------------------------------------------------------------------------------------------------------------------------------------------------------------------------------------------------|
| Body weight                                                          | Measured after minimum 6 hours of fasting and without cloth<br>Scale: Seca 701 7021099                                                                                                                                                                                                                                                                                                                         |
| Blood tests (fasting)                                                | Peripheral venous blood                                                                                                                                                                                                                                                                                                                                                                                        |
| Transient liver elastography / Controlled Attenuated Parameter (CAP) | Fibro scan, M-XL probe,<br>(Echosens, Paris, France)                                                                                                                                                                                                                                                                                                                                                           |
| Carotid intima-media thickness (cIMT)                                | Sonosite M-Turbo (Sonosite Inc., Bothell, WA, USA), analysed with a 13.6 MHz linear transducer and automated software (SonoCalc IMT 5.0; Sonosite Inc.)                                                                                                                                                                                                                                                        |
| CT scans                                                             | CT chest, CT upper abdomen and Coronary Calcium Scan<br>Aquilion One scanner, Toshiba Medical Systems, (Otawara-shi, Tochigi-ken, Japan)                                                                                                                                                                                                                                                                       |
| DEXA scan                                                            | Dual energy X-ray absorptiometry (DEXA)<br>Whole-body DEXA scanning<br>Hologic QDR-2000 W (Bedford, MA, USA)                                                                                                                                                                                                                                                                                                   |
| Cardiac MRI                                                          | MAGNETOM Prisma 3 Tesla scan,<br>SIEMENS Healthineers (Erlangen Germany)                                                                                                                                                                                                                                                                                                                                       |
| Metabolic syndrome <sup>1</sup>                                      | Central obesity: waist circumference $\geq 94$ cm for males and $\geq 80$ cm for females (Europids), or BMI $> 30$ kg/m <sup>2</sup> , plus any two of the following four factors: <ul style="list-style-type: none"> <li>• Raised triglycerides: <math>&gt; 1,7</math> mmol/L</li> <li>• Reduced HDL cholesterol: <math>\leq 1,03</math> mmol/L in males, <math>&lt; 1,29</math> mmol/L in females</li> </ul> |

|                                                                                 |                                                                                                                                                                                                                                                                                                                                  |
|---------------------------------------------------------------------------------|----------------------------------------------------------------------------------------------------------------------------------------------------------------------------------------------------------------------------------------------------------------------------------------------------------------------------------|
|                                                                                 | <ul style="list-style-type: none"> <li>• Raised blood pressure (BP): Systolic BP <math>\geq 130</math> mmHg or diastolic BP <math>\geq 85</math> mmHg or treatment of previously diagnosed hypertension</li> <li>• Raised fasting plasma glucose: <math>\geq 5,6</math> mmol/L or previously diagnosed type2-diabetes</li> </ul> |
| Insulin resistance and $\beta$ -cell function                                   | <p>Homeostatic Model Assessment of Insulin Resistance (HOMA-IR):</p> $HOMA - IR = \frac{FPG (mmol/L) \cdot FPI (mU/L)}{22.5}$ $HOMA - \%B = \frac{20 \cdot FPI (mU/L)}{FPG (mmol/L) - 3,5}$                                                                                                                                      |
| Type 2 diabetes <sup>2</sup>                                                    | <ul style="list-style-type: none"> <li>• Fasting plasma glucose concentration <math>\geq 7.0</math> mmol/L or</li> <li>• a random venous plasma glucose concentration <math>\geq 11.1</math> mmol/L or</li> <li>• HbA1c <math>&gt; 48</math> mmol/mol</li> </ul>                                                                 |
| Cardiovascular disease risk scores<br>Framingham Risk Score<br>D:A:D risk score | Online calculation tool, CHIP – Centre of Excellence for Health & Framingham Heart Study                                                                                                                                                                                                                                         |
| Survey                                                                          | <ul style="list-style-type: none"> <li>• 12-Item Short term Survey (SF-12)</li> <li>• Questionnaire on dietary and activity patterns</li> </ul>                                                                                                                                                                                  |

<sup>1</sup> Metabolic syndrome defined in accordance with The International Diabetes Federations definition

<sup>2</sup> WHO definition

**Table 4 Blood and Plasma Analysis**

| Category     | Blood and Plasma analysis                                                                                                                                       |
|--------------|-----------------------------------------------------------------------------------------------------------------------------------------------------------------|
| Hematology   | Leucocyte count and differential count, hemoglobin, hematocrit                                                                                                  |
| Electrolytes | Sodium, Potassium                                                                                                                                               |
| Renal        | Creatinine, urea, albumin                                                                                                                                       |
| Liver        | Alanine aminotransferase, aspartate transaminase, bilirubin, lactate dehydrogenase                                                                              |
| HIV-safety   | HIV-RNA*, CD4 cell count*                                                                                                                                       |
| Metabolism   | Glucose, insulin, blood glycated hemoglobin, total cholesterol, HDL-cholesterol, LDL-cholesterol, VLDL-cholesterol, LDL-cholesterol (calculated), triglycerides |
| Inflammation | High sensitivity C-reactive protein, interleukin 1 $\beta$ and 6*                                                                                               |
| Coagulation  | D-dimer, factor II+VII+X, fibrinogen, platelet count                                                                                                            |

1  
2  
3  
4  
5  
6  
7  
8  
9  
10  
11  
12  
13  
14  
15  
16  
17  
18  
19  
20  
21  
22  
23  
24  
25  
26  
27  
28  
29  
30  
31  
32  
33  
34  
35  
36  
37  
38  
39  
40  
41  
42  
43  
44  
45  
46  
47  
48  
49  
50  
51  
52  
53  
54  
55  
56  
57  
58  
59  
60

|                      |                                                                            |
|----------------------|----------------------------------------------------------------------------|
| Platelet function    | Soluble P-selectin*, Soluble glycoprotein VI*                              |
| Endothelial function | Vascular cell adhesion molecule 1*, intercellular adhesion,<br>molecule 1* |
| Cardiac              | N-terminal pro-B-type natriuretic peptide, Troponin T                      |

Blood tests are performed at visits in week1, week24 and week48. Participants will be fasting minimum 6 hours prior to blood tests. Non-HIV-infected controls will have blood tests prior to- or at the day of CMRI and will not be fasting.

Blood analysis with \* will be performed only in PLWH.

## CARDIAC MRI SUB STUDY

Forty participants (randomized 1:1) from the main study will be included in the CMRI sub study.

Cardiac MRI and ECG-monitoring will be performed on the sub-study population at baseline and week 48. Further, 20 non-HIV-infected controls will be recruited for a single CMRI to compare baseline data. CMRI technical details and scan protocol are elaborated in Appendix 2.

The following clinical information will be obtained from healthy controls or from their patient records: Medicine use, known medical conditions, cardiac risk (smoking status, alcohol consumption, family CVD history), height and weight. Blood pressure and heart rate will be measured at the day of CMRI. Blood tests will be performed prior to- or at the day of CMRI. See Table 4 for blood and plasma testing details.

## DATA MANAGEMENT

The participant data including demographics, medical history, laboratory- and investigational results will be recorded in digital eCRFs in Research Electronic Data Capture (REDCap), a secure web

1  
2  
3  
4 application for administration of databases in non-commercial clinical research. Investigators or  
5  
6 appointed research nurses will manually enter the data. Only authorized personnel such as the  
7  
8 sponsor, investigator, sub-investigator, or study nurses will have encoded access via personal user  
9  
10 ID and password. All data will be handled confidentially, in accordance with “The Danish Act on  
11  
12 Processing of Personal Data and General Data Protection Regulation (GDPR). Study data will be  
13  
14 published in pseudonymous form only after being extracted by the primary investigator at study  
15  
16  
17 termination.  
18  
19  
20  
21

## 22 **STATISTICAL METHODS**

23  
24 All participants will be included in the intention to treat analysis. Only patients who have completed  
25  
26 the last follow up will be included in the per protocol analysis.  
27  
28

### 29 **Descriptive Statistics**

30  
31 Baseline characteristics will be presented in Table 1 grouped by treatment arm. Continuous  
32  
33 variables will be presented as median [IQR] or mean $\pm$ SD and compared by unpaired t-test or  
34  
35 Mann-Whitney U test depending on distribution of data. Categorical variables will be presented as  
36  
37 number and percentage, groups will be compared with chi-square test or Fisher’s exact test.  
38  
39

40  
41 Carciac Magnetic Resonance Sub Study data will be presented similarly.  
42  
43

### 44 **Analysis Set**

45  
46 Data from randomized subjects who have completed their baseline visit and week 48 follow up,  
47  
48 adherent to treatment as per protocol, will be included in the per protocol analysis in evaluation of  
49  
50 primary outcome. Absolute change in mean fasting weight from baseline to week 48 will be  
51  
52 compared between the intervention and the control group by two-tailed unpaired t-test. Continuous  
53  
54 secondary endpoints will be analyzed and presented similarly to the primary analysis of weight  
55  
56  
57  
58  
59  
60

1  
2  
3  
4  
5  
6  
7  
8  
9  
10  
11  
12  
13  
14  
15  
16  
17  
18  
19  
20  
21  
22  
23  
24  
25  
26  
27  
28  
29  
30  
31  
32  
33  
34  
35  
36  
37  
38  
39  
40  
41  
42  
43  
44  
45  
46  
47  
48  
49  
50  
51  
52  
53  
54  
55  
56  
57  
58  
59  
60

change. Categorical variables will be compared with chi-square test or Fisher's exact test. No interim analysis is planned.

## Missing Data

Missing data will be analyzed with the assumption that data are "missing at random" (MAR) and analyzed using multiple imputation. At study termination an analysis to check for pattern of missing data and association between missing and observed data will be performed to ensure missing data is MAR.

## METHODS: MONITORING

### Data Monitoring

External data monitoring will be performed according to ICH-GCP by the public "Danish GCP Units, Copenhagen". Data collection and handling will be conducted according to a monitoring plan and written standard procedures (SOP) and in accordance with GCP regulations and requirements. There are no planned interim analyses in the study.

### Harms

Serious adverse events (SAE) and unexpected serious adverse reactions will be evaluated and documented by the primary investigator and reported to the sponsor in accordance with GCP and Danish medicine Agency regulatory. A yearly report including all emerged SARs and SUSARs and comments on general safety in the study will be sent to the Danish Medicines Agency. In case of death or life-threatening disease, the sponsor will report the SUSAR to Danish Medicines Agency and the regional Research Health Ethics Committee within 7 days of the sponsor's knowledge of the event. A final report of registered events will be generated at study terminations and reported to the Danish Medicines Agency and Health Research Ethics committee of the Capital Region of Denmark.

## ETHICS AND DISSEMINATION

### Protocol Amendments

Any possible protocol modification will be reported in a protocol amendment to relevant public authorities.

### Consent or Assent

All participants will be informed of the study by the means of oral and written information, per usual ICH standards, with full details of the study, including risk and benefits, before enrollment. Participants will be informed of the right to obtain an assessor. Only the principal investigator or co-investigators will be allowed to obtain informed consent from participants. Appendix 1 shows the informed consent form.

An additional consent will be retrieved for a project specific plasma biobank for subsequent analyses (project specific biobank) and a biobank for future research. Biobank details are listed in Appendix 3.

### Confidentiality

Sponsor and investigators are obliged to handle all data on trial participants confidentially in accordance with the Act on Processing of Personal Data. At the end of the study, the primary investigator will extract data from the electronic database REDCap to perform the planned analyses on primary and secondary outcomes. Data will be processed and analyzed in the free statistic software R Studio. Study data will subsequently be published only in anonymous form. Data will be handled based on Danish law of data protection and Danish data protection regulation.

### Declaration of Interest

There are no conflicts of interest to declare.



## Data Access

The study is registered at ClinicalTrials.gov Identifier (NCT04904406, registered the 27th of May 2021). Access to final data will be limited to sponsor, primary investigator and personnel involved in the analysis of data, co-investigator, and statisticians. The data that support the findings of this study are available upon reasonable request. The data are not publicly available due to Danish legislation regarding General Data Protection Regulation.

## Ancillary and post-trial care

All areas of the Danish health care system are covered by a publicly funded compensation scheme. The scheme covers if a participant is injured in connection with treatment at a public hospital. The scheme covers medicinal product injuries. This also applies for patients involved in research. At inclusion, the participants will be informed of the compensation and complaint avenues in case a drug injury occurs, which is in adherence to Danish law.

## Dissemination policy: trial results

Upon the completion of the trial, the data collected from all participating sites will be pooled and analyzed together. Researchers involved in the trial will not be permitted to publish data until after the main study publication is released. The results of the primary study will be featured in a peer-reviewed journal, with the primary investigator as the first author, the sponsor as the senior author, and the participating investigators as co-authors based on their work and involvement in the study. All findings, whether positive, negative, or inconclusive, will be published. The cardiac MRI sub study data will be reported separately.

## Patient and Public Involvement statement

Patients/public were not involved until initiation of inclusion in the trial. The research question was developed in the clinic by clinicians treating the involved patient group. The patients/public were

1  
2  
3  
4 not involved in the design, conduct or recruitment of the study, but the study was designed to make  
5  
6  
7 the participation as accessible and effortless as possible for patients. Participants will be informed  
8  
9  
10 about the study results by letter at study termination unless they opt this out in the consent form.  
11

## 12 **Author Statement**

13  
14 Roles of corresponding author and co-authors:  
15  
16

## 17 **Roles and Responsibility**

18  
19 Karen Brorup Heje Pedersen, corresponding author: Conceptualization, Methodology, Formal  
20  
21 analysis, Investigation, Data Curation, Writing - Original Draft, Visualization, Project administration  
22  
23

24  
25 Thomas Benfield, Sponsor: Conceptualization, Methodology, Formal analysis, Investigation, Writing  
26  
27 - Original Draft, Visualization, Writing - Review & Editing, Project administration, Supervision,  
28  
29 Funding acquisition  
30  
31

32  
33 Andreas Knudsen: Conceptualization, Methodology, Writing - Review & Editing, Supervision  
34  
35

36  
37 Søren Møller, Professor: Conceptualization, Methodology, Resources, Writing - Review & Editing,  
38  
39 Supervision,  
40

41  
42 Hartwig Roman Siebner: Conceptualization, Methodology, Resources , Writing - Review & Editing,  
43  
44 Supervision  
45

46  
47 Jens Dahlgaard Hove: Conceptualization, Methodology, Validation, Formal analysis, Resources,  
48  
49 Writing - Review & Editing, Supervision,  
50

51  
52 Jan Gerstoft: Conceptualization, Methodology, Writing - Review & Editing, Supervision  
53  
54  
55  
56  
57  
58  
59  
60

## REFERENCES

1. Lohse N, Obel N. Update of Survival for Persons With HIV Infection in Denmark. *Ann Intern Med*. 2016 Nov 15;165(10):749–50.
2. Belloso WH, Orellana LC, Grinsztejn B, Madero JS, La Rosa A, Veloso VG, et al. Analysis of serious non-AIDS events among HIV-infected adults at Latin American sites. *HIV Med*. 2010 Oct 1;11(9):554–64.
3. Smith CJ, Ryom L, Weber R, Morlat P, Pradier C, Reiss P, et al. Trends in underlying causes of death in people with HIV from 1999 to 2011 (D:A:D): a multicohort collaboration. *Lancet*. 2014 Jul 19;384(9939):241–8.
4. Freiberg MS, Chang CCH, Kuller LH, Skanderson M, Lowy E, Kraemer KL, et al. HIV infection and the risk of acute myocardial infarction. *JAMA Intern Med*. 2013 Apr 22;173(8):614–22.
5. Feinstein MJ, Bahiru E, Achenbach C, Longenecker CT, Hsue P, So-Armah K, et al. Patterns of Cardiovascular Mortality for HIV-Infected Adults in the United States: 1999 to 2013. *Am J Cardiol*. 2016 Jan 15;117(2):214–20.
6. Sabin CA, Reiss P, Ryom L, Phillips AN, Weber R, Law M, et al. Is there continued evidence for an association between abacavir usage and myocardial infarction risk in individuals with HIV? A cohort collaboration. *BMC Med*. 2016 Mar 31;14:61.
7. Worm SW, Sabin C, Weber R, Reiss P, El-Sadr W, Dabis F, et al. Risk of myocardial infarction in patients with HIV infection exposed to specific individual antiretroviral drugs from the 3 major drug classes: the data collection on adverse events of anti-HIV drugs (D:A:D) study. *J Infect Dis*. 2010 Feb 1;201(3):318–30.
8. D:A:D Study Group, Sabin CA, Worm SW, Weber R, Reiss P, El-Sadr W, et al. Use of nucleoside reverse transcriptase inhibitors and risk of myocardial infarction in HIV-infected patients enrolled in the D:A:D study: a multi-cohort collaboration. *Lancet*. 2008 Apr 26;371(9622):1417–26.
9. Choi AI, Vittinghoff E, Deeks SG, Weekley CC, Li Y, Shlipak MG. Cardiovascular risks associated with abacavir and tenofovir exposure in HIV-infected persons. *AIDS*. 2011 Jun 19;25(10):1289–98.

10. Desai M, Joyce V, Bendavid E, Olshen RA, Hlatky M, Chow A, et al. Risk of cardiovascular events associated with current exposure to HIV antiretroviral therapies in a US veteran population. *Clin Infect Dis*. 2015 Aug 1;61(3):445–52.
11. O'Halloran JA, Dunne E, Tinago W, Denieffe S, Kenny D, Mallon PWG. Switching from abacavir to tenofovir disoproxil fumarate is associated with rises in soluble glycoprotein VI, suggesting changes in platelet-collagen interactions. *AIDS*. 2018 24;32(7):861–6.
12. Koethe JR, Jenkins CA, Lau B, Shepherd BE, Justice AC, Tate JP, et al. Rising Obesity Prevalence and Weight Gain Among Adults Starting Antiretroviral Therapy in the United States and Canada. *AIDS Res Hum Retroviruses*. 2016 Jan;32(1):50–8.
13. Bakal DR, Coelho LE, Luz PM, Clark JL, De Boni RB, Cardoso SW, et al. Obesity following ART initiation is common and influenced by both traditional and HIV-/ART-specific risk factors. *J Antimicrob Chemother*. 2018 01;73(8):2177–85.
14. Hill A, Waters L, Pozniak A. Are new antiretroviral treatments increasing the risks of clinical obesity? *J Virus Erad*. 5(1):41–3.
15. Sax PE, Erlandson KM, Lake JE, McComsey GA, Orkin C, Esser S, et al. Weight Gain Following Initiation of Antiretroviral Therapy: Risk Factors in Randomized Comparative Clinical Trials. *Clin Infect Dis*. 2019 Oct 14;
16. Dupont E, Yombi JC. Antiretroviral therapy and weight gain in antiretroviral treatment-experienced HIV patients: A review. *AIDS Rev*. 2023;25(1):54–64.
17. Thompson D, Edelsberg J, Colditz GA, Bird AP, Oster G. Lifetime health and economic consequences of obesity. *Arch Intern Med*. 1999 Oct 11;159(18):2177–83.
18. Consensus statements [Internet]. [cited 2019 Dec 6]. Available from: <https://www.idf.org/e-library/consensus-statements/60-idfconsensus-worldwide-definition-of-the-metabolic-syndrome.html>
19. HEARTS D: diagnosis and management of type 2 diabetes [Internet]. [cited 2022 Oct 14]. Available from: <https://www.who.int/publications-detail-redirect/who-ucn-ncd-20.1>
20. Wallace TM, Levy JC, Matthews DR. Use and abuse of HOMA modeling. *Diabetes Care*. 2004 Jun;27(6):1487–95.

1  
2  
3  
4  
5  
6  
7  
8  
9  
10  
11  
12  
13  
14  
15  
16  
17  
18  
19  
20  
21  
22  
23  
24  
25  
26  
27  
28  
29  
30  
31  
32  
33  
34  
35  
36  
37  
38  
39  
40  
41  
42  
43  
44  
45  
46  
47  
48  
49  
50  
51  
52  
53  
54  
55  
56  
57  
58  
59  
60

21. 2018 Prevention Guidelines Tool CV Risk Calculator [Internet]. [cited 2023 Apr 4]. Available from: <http://static.heart.org/riskcalc/app/index.html#!/baseline-risk>
22. Framingham Heart Study [Internet]. [cited 2019 Dec 11]. Available from: <https://www.framinghamheartstudy.org/fhs-risk-functions/cardiovascular-disease-10-year-risk/>
23. CHIP – Centre of Excellence for Health, Immunity and Infections [Internet]. [cited 2019 Dec 17]. Available from: <https://chip.dk/Tools-Standards/Clinical-risk-scores>

For peer review only

## FIGURE LEGENDS

### Figure 1: Participants Timeline and Data Collection

a) Eligible participants on abacavir/dolutegravir/lamivudine (ABC/DTG/3TC) for HIV infection for more than 6 months will be enrolled. Inclusion, randomization, and data collection will be performed at baseline visit in week 1 (w1). Participants will be randomized to either continuation of a three-drug regimen with ABC/DTG/3TC (control) or a two-drug regimen 2DR DTG/3TC (intervention). Data will be collected at follow up visits at week 4 (w4), week 24 (w24) and week 48 (w48). At study visits w1, w24, and w48 the following tests will be performed: Physical examination by clinician; blood tests including HIV-RNA and CD4 cell count; computed tomography scan (CT) of thorax and the upper abdomen, Dual-Energy x-ray absorptiometry (DXA) scan; 12-Item Short Form Survey (SF-12); liver elastography; External carotid artery ultrasound. Participants in the intervention arm will have plasma HIV RNA determined at week 4 for safety reasons. b) Participants enrolled in the cardiac MRI (CMR) sub study will additionally receive CMR and 24-hours Holter ECG monitoring at visits w1 and w48.

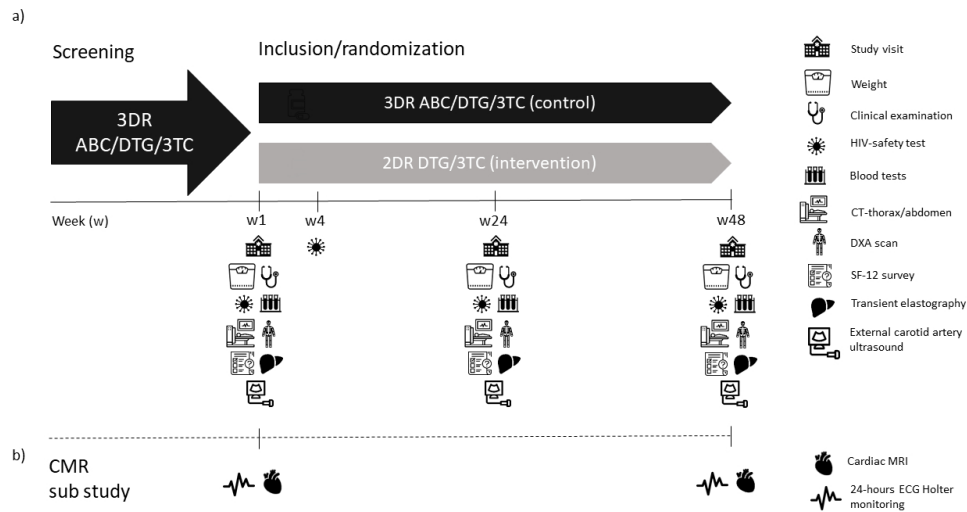

a) Eligible participants on abacavir/dolutegravir/lamivudine (ABC/DTG/3TC) for HIV infection for more than 6 months will be enrolled. Inclusion, randomization, and data collection will be performed at baseline visit in week 1 (w1). Participants will be randomized to either continuation of a three-drug regimen with ABC/DTG/3TC (control) or a two-drug regimen 2DR DTG/3TC (intervention). Data will be collected at follow up visits at week 4 (w4), week 24 (w24) and week 48 (w48). At study visits w1, w24, and w48 the following tests will be performed: Physical examination by clinician; blood tests including HIV-RNA and CD4 cell count; computed tomography scan (CT) of thorax and the upper abdomen, Dual-Energy x-ray absorptiometry (DXA) scan; 12-Item Short Form Survey (SF-12); liver elastography; External carotid artery ultrasound. Participants in the intervention arm will have plasma HIV RNA determined at week 4 for safety reasons. b) Participants enrolled in the cardiac MRI (CMR) sub study will additionally receive CMR and 24-hours Holter ECG monitoring at visits w1 and w48.

338x190mm (96 x 96 DPI)

1  
2  
3  
4  
5  
6  
7  
8  
9  
10  
11  
12  
13 **SUPPLEMENTARY MATERIAL**  
14  
15 **AVERTAS TRIAL**  
16  
17  
18  
19

20  
21 Changes in weight, body composition and metabolic parameters after switch to dolutegravir and  
22  
23 lamivudine compared to continued treatment with dolutegravir, abacavir and lamivudine for  
24  
25 virologically suppressed HIV infection:  
26  
27

28 A randomized open-label superiority trial - The AVERTAS trial  
29  
30

31  
32  
33 **Registration**  
34

35  
36 Protocol version: Awaiting amendment approval, protocol version 9.0 April 04, 2023  
37  
38

39 Ethics Committee of the Capital Region, Denmark (H-20011433)  
40  
41

42 Danish Medicines Agency (EudraCT no. 2019-004999-19)  
43  
44

45 Regional Data Protection Centre (P-2020-207)  
46  
47

48 clinicaltrials.gov (NCT04904406)  
49  
50  
51  
52  
53  
54  
55  
56  
57  
58  
59  
60



1  
2  
3  
4  
5 **Table of Content**

6 **APPENDIX 1** .....3

7

8 **Radiological studies** .....3

9 **Computed Tomography (CT) scan** .....3

10 **Chest CT**.....3

11 **Coronary Artery Calcium Score (CACs)**.....3

12 **Unenhanced CT scan of the upper abdomen** .....3

13 **Visceral and subcutaneous adipose tissue scan**.....3

14 **Transient liver elastography (Fibro scan)** .....4

15 **Carotid Intima-Media Thickness (cIMT)** .....4

16 **Dual Energy X-ray Absorptiometry (DEXA)** .....4

17 **Cardiac Magnetic Resonance Imaging (Cardiac-MRI) SUB STUDY**.....5

18 **Holter Monitor ECG Recording (R-test)** .....5

19 **APPENDIX 2** .....6

20 **Project Specific Biobank**.....6

21 **Biobank for Future Research** .....6

22 **REFERENCES** .....6

23

24

25

26

27

28

29

30

31

32

33

34

35

36

37

38

39

40

41

42

43

44

45

46

47

48

49

50

51

52

53

54

55

56

57

58

59

60

## APPENDIX 1

### Radiological studies

#### Computed Tomography (CT) scan

All CT imaging will be performed using a 320-multidetector scanner (Toshiba Medical Systems, Otawara-shi, Tochigi-ken, Japan). CT scans will encompass a low-dose chest CT, an unenhanced coronary artery calcium score (CACS), and an unenhanced scan of the upper abdomen to determine liver steatosis and an abdominal single slice acquisition for measurements of visceral adipose tissue (VAT), and subcutaneous adipose tissue (SAT). No contrast will be used in the scan protocol. The CT scans will be optional. All CT-analyses will be conducted by trained physicians blinded to randomization, clinical and biochemical details of the study participants.

#### Chest CT

The chest examination will use a low-dose protocol with images captured at full inspiration using automatic exposure control at 120 kV with an SD of 15. AIDR will be used for image reconstruction with both 1/1 mm and 3/3 mm slices. A lung kernel (FC52) will be used for thin-slice dataset reconstruction to evaluate lung parenchyma and airways, while a soft tissue kernel will be used for thicker slices to evaluate mediastinum and pleurae. A soft tissue kernel (FC08) and filtered back projection will be used to reconstruct an additional dataset with 1/1 mm slices for quantitative emphysema measurements using a dedicated lung density program (Vitrea Vital Images, Minnetonka, MN, U.S.).

#### Coronary Artery Calcium Score (CACS)

120kV (BMI < 28) or 135 kV (BMI > 28), automatic exposure control with an SD 55 (min 30 mA and max 300 mA). ECG-triggering with exposure at 75% of the RR-interval will be used, and reconstructions will be performed with a soft tissue kernel (FC12) and 3/3 mm slice thickness/increment.

1  
2  
3  
4  
5  
6  
7  
8  
9  
10  
11  
12  
13  
14  
15  
16  
17  
18  
19  
20  
21  
22  
23  
24  
25  
26  
27  
28  
29  
30  
31  
32  
33  
34  
35  
36  
37  
38  
39  
40  
41  
42  
43  
44  
45  
46  
47  
48  
49  
50  
51  
52  
53  
54  
55  
56  
57  
58  
59  
60

### **Unenhanced CT scan of the upper abdomen**

A single 16 cm volume scan extending from the left hemidiaphragm and downwards using 40 mA (fixed) and 120 kV. reconstructions will be performed with 1/1 mm and a soft tissue kernel (FC12) using an iterative reconstruction technique (Adaptive Iterative Dose Reduction, AIDR).

Liver attenuation will be measured using Vitrea 3.1 imaging software (Vital Images Inc., Minnetonka, MN, USA). Two regions of interest (ROI) with an area of 1500 mm<sup>2</sup> (+/- 100 mm<sup>2</sup>) will be placed in Coinaud liver segments 5 and 6, and the average liver attenuation calculated in Hounsfield Units (HU). Moderate-to-severe hepatic steatosis will be defined as CT liver attenuation <48 HU with a specificity of 100%, sensitivity of 53.8%, positive predictive value of 100%, and negative predictive value of 93.9%.

### **Visceral and subcutaneous adipose tissue scan**

A single 8 mm slice at the level of lumbar vertebra 4 (L4) will be performed using 120kV and 210 mA. Reconstructions will be performed with filtered back projection (FBP) and soft tissue kernel (FC08). Trained personnel will use commercially available CT software (Fat Measurement, Aquilion ONE; Canon, Japan) to measure the cross-sectional area of adipose tissue defined as voxels with attenuation values in the range of - 150 to - 70 Hounsfield units. From within a manually adjusted region of interest delineated by the muscular compartments, VAT area will be calculated automatically. SAT will be defined as adipose tissue superficial to the abdominal and paraspinal muscles. Intraintestinal and intramuscular adipose tissues will be manually excluded. Mean density for VAT and SAT, respectively, will be calculated and reported, using four regions of interest within each fat depot.

### **Transient liver elastography (Fibro scan)**

Transient elastography will be performed by trained personnel using Fibro scan (Echosens<sup>TM</sup>, Paris, France) to assess liver stiffness and quantify liver fat. With the fasting participant in supine position,

1  
2  
3  
4 the transducer will be placed on the skin in an intercostal space in the right midaxillary line at the  
5  
6 level of the right liver lobe. The liver stiffness and controlled attenuation parameter (CAP) is  
7  
8 measured using a M- or XL probe. Liver stiffness will be expressed in kilopascal (kPa) and CAP in  
9  
10 dB/m. The physiologic stiffness of the liver parenchyma is  $5.5 \pm 1.6$  kPa by transient elastography  
11  
12 (1). Liver stiffness is positively correlated with liver fibrosis, yielding higher LSM with higher amounts  
13  
14 of liver fibrosis. In this study we define significant liver fibrosis as  $LSM \geq 7.6$  kPa (2). CAP quantifies  
15  
16 liver fat by applying a proprietary algorithm to evaluate the decrease in amplitude of ultrasound  
17  
18 waves propagating through the (3). The cut-off for fatty liver will be set at 285 dB/m. Patients must  
19  
20 be fasting for a minimum of two hours prior to the procedure.  
21  
22  
23  
24  
25

### 26 **Carotid Intima-Media Thickness (cIMT)**

27  
28 External carotid artery ultrasound will be performed to determine intimal thickness as a measure of  
29  
30 arteriosclerosis. cIMT will be measured bilaterally at the far wall of the distal common carotid artery  
31  
32 caudally of the sinus caroticus covering 10 mm using a Sonosite M-Turbo (Sonosite Inc., Bothell,  
33  
34 WA, USA) with a 13.6 MHz linear transducer and automated software (SonoCalc IMT 5.0; Sonosite  
35  
36 Inc.). The measurement will be performed in one projection in a longitudinal view with both the near  
37  
38 and far wall visible. An increased cIMT will be defined as an average thickness of  $> 900$   $\mu\text{m}$ . Average  
39  
40 measurements  $> 900$   $\mu\text{m}$  or visible plaques will result in referral to the Department of Clinical  
41  
42 Physiology for further evaluation (4).  
43  
44  
45  
46  
47

### 48 **Dual Energy X-ray Absorptiometry (DEXA)**

49  
50 To estimate the amount of fat in the trunk and the extremities whole-body DEXA scanning [Hologic  
51  
52 QDR-2000 W (Bedford, MA, USA) in single beam mode; in vivo coefficient of variation (CV) 1.6 for  
53  
54 total and 3.2 for regional fat mass (10 duplicate measurements)] will be performed. The trunk will be  
55  
56 defined as the region including the chest, abdomen, and pelvis. The upper limit of the leg region will  
57  
58  
59  
60

1  
2  
3  
4 be placed through the hip joints at an angle of approximately 45°, and the upper limit of the arm  
5  
6 region will be placed vertically through the shoulder joints. Peripheral or limb fat mass will be defined  
7  
8 as the sum of arm and leg fat masses. The percentage of limb  
9  
10 fat will be calculated as (limb fat mass/ total fat mass) x 100% (5). Patient's weight will be estimated  
11  
12 by DEXA. Patients must be fasting for 6 hours prior to scanning. DEXA will be performed at baseline,  
13  
14 week 24 and 48.  
15  
16  
17  
18

### 19 **Cardiac Magnetic Resonance Imaging (Cardiac-MRI) SUB STUDY**

20 The cardiac MRI protocol includes functional and structural MRI measurements and will be optional.  
21  
22 MRI scans will be performed at a MAGNETOM Prisma 3 Tesla scan, SIEMENS Healthineers  
23  
24 (Erlangen Germany) at Hvidovre hospital. A SSFP MRI imaging sequence will be applied to  
25  
26 determine the volume and function of the atria and ventricles using a 2D cine imaging protocol.  
27  
28 Biventricular and bi-atrial function are evaluated from trans axial (7mm, no gap, temporal resolution  
29  
30 25-45 msec) and from short axis slices (double oblique) which also entails the atria. In addition, 2,3,  
31  
32 and 4 chamber sequences are obtained of the left ventricle. The blood flow will be determined in the  
33  
34 pulmonary artery and aorta and the flow velocity and compliance of aorta will be evaluated using  
35  
36 phase contrast flow sequences. Structural myocardial MRI will involve T1 measurements using a  
37  
38 Modified Look-Locker Imaging (MOLLI) sequence performed during one breath-hold per slice (6).  
39  
40 Patients with an eGFR larger than 45 ml/min will subsequently undergo additional T1 mapping after  
41  
42 intravenous injection of gadolinium contrast (gadobutrol (gadovist) in low concentration (0.1  
43  
44 mmol/kg) to detect local and diffuse myocardial fibrosis. The MR images are subsequently  
45  
46 transferred to a dedicated workstation where the imaging analysis will be performed.  
47  
48  
49  
50  
51  
52  
53  
54  
55 To calculate extracellular volume (ECV) erythrocyte volume will be needed. This plasma analysis is  
56  
57 already performed in the main study.  
58  
59  
60

### Holter Monitor ECG Recording (R-test)

Heart rhythm will be monitored by Holter monitor ECG recording (R-test) for 24 hours. A Cortrium C3+ Holter Monitor will be applied at to the chest with three pads. The 24-hour ECG data will be read and analyzed in a dedicated software system. Any event of arrhythmia will be registered during the R-test and evaluated.

For peer review only

## APPENDIX 2

### Biobank

#### Project Specific Biobank

At week 1, 24 and 48 3 ml will be collected for the purpose of detecting plasma interleukin 1 $\beta$  and 6, soluble P-selectin, soluble glycoprotein VI, vascular cell adhesion molecule 1, intercellular adhesion molecule 1. A project-specific research biobank will be established for freezer storage in a -80 °C freezer located at the Copenhagen University Hospital – Amager and Hvidovre. Plasma will be stored pseudo anonymized marked with study-IDs. The identification key will be kept separately. The project specific biobank will be terminated immediately after collection of the last patients' blood samples. Samples will be analyzed collectively. Any excess blood will be stored in a biobank for future research.

#### Biobank for Future Research

A biobank for future research will be established. Besides excess blood material from the project specific biobank, additional blood samples are drawn (3 ml) at visit 1, 24 and 48 and stored in a -80 °C freezer. Patients must give separate written consent to allow storage of their biological material for future research outside this study. Permission on biobank for future research will be applied from The Danish Data Protection Agency. The biological material will be handled and stored according to the agency's guidelines.

## REFERENCES

1. Roulot D, Czernichow S, Le Clésiau H, Costes JL, Vergnaud AC, Beaugrand M. Liver stiffness values in apparently healthy subjects: influence of gender and metabolic syndrome. *J Hepatol.* april 2008;48(4):606–13.
2. Hsu C, Caussy C, Imajo K, Chen J, Singh S, Kaulback K, m.fl. Magnetic Resonance vs Transient Elastography Analysis of Patients With Nonalcoholic Fatty Liver Disease: A

1  
2  
3  
4  
5  
6  
7  
8  
9  
10  
11  
12  
13  
14  
15  
16  
17  
18  
19  
20  
21  
22  
23  
24  
25  
26  
27  
28  
29  
30  
31  
32  
33  
34  
35  
36  
37  
38  
39  
40  
41  
42  
43  
44  
45  
46  
47  
48  
49  
50  
51  
52  
53  
54  
55  
56  
57  
58  
59  
60

Systematic Review and Pooled Analysis of Individual Participants. *Clin Gastroenterol Hepatol Off Clin Pract J Am Gastroenterol Assoc.* marts 2019;17(4):630-637.e8.

3. Sasso M, Audière S, Kemgang A, Gaouar F, Corpechot C, Chazouillères O, m.fl. Liver Steatosis Assessed by Controlled Attenuation Parameter (CAP) Measured with the XL Probe of the FibroScan: A Pilot Study Assessing Diagnostic Accuracy. *Ultrasound Med Biol.* januar 2016;42(1):92–103.
4. Knudsen A, Malmberg CAE, Kjær A, Lebech AM. Low prevalence of peripheral arterial disease in a cross-sectional study of Danish HIV-infected patients. *Infect Dis Lond Engl.* 2015;47(11):776–82.
5. Hansen BR, Haugaard SB, Jensen FK, Jensen JEB, Andresen L, Iversen J, m.fl. Long-term high-physiological-dose growth hormone reduces intra-abdominal fat in HIV-infected patients with a neutral effect on glucose metabolism. *HIV Med.* april 2010;11(4):266–75.
6. Taylor AJ, Salerno M, Dharmakumar R, Jerosch-Herold M. T1 Mapping: Basic Techniques and Clinical Applications. *JACC Cardiovasc Imaging.* januar 2016;9(1):67–81.



# Reporting checklist for protocol of a clinical trial.

Based on the SPIRIT guidelines.

## Instructions to authors

Complete this checklist by entering the page numbers from your manuscript where readers will find each of the items listed below.

Your article may not currently address all the items on the checklist. Please modify your text to include the missing information. If you are certain that an item does not apply, please write "n/a" and provide a short explanation.

Upload your completed checklist as an extra file when you submit to a journal.

In your methods section, say that you used the SPIRIT reporting guidelines, and cite them as:

Chan A-W, Tetzlaff JM, Gøtzsche PC, Altman DG, Mann H, Berlin J, Dickersin K, Hróbjartsson A, Schulz KF, Parulekar WR, Krleža-Jerić K, Laupacis A, Moher D. SPIRIT 2013 Explanation and Elaboration: Guidance for protocols of clinical trials. *BMJ*. 2013;346:e7586

|                                             |                     | Reporting Item                                                                                               | Page Number |
|---------------------------------------------|---------------------|--------------------------------------------------------------------------------------------------------------|-------------|
| <b>Administrative information</b>           |                     |                                                                                                              |             |
| Title                                       | <a href="#">#1</a>  | Descriptive title identifying the study design, population, interventions, and, if applicable, trial acronym | 1           |
| Trial registration                          | <a href="#">#2a</a> | Trial identifier and registry name. If not yet registered, name of intended registry                         | 1, 4        |
| Trial registration: data set                | <a href="#">#2b</a> | All items from the World Health Organization Trial Registration Data Set                                     | NA          |
| Protocol version                            | <a href="#">#3</a>  | Date and version identifier                                                                                  | 1           |
| Funding                                     | <a href="#">#4</a>  | Sources and types of financial, material, and other support                                                  | 3           |
| Roles and responsibilities: contributorship | <a href="#">#5a</a> | Names, affiliations, and roles of protocol contributors                                                      | 1,2         |

|    |                           |                     |                                                          |   |
|----|---------------------------|---------------------|----------------------------------------------------------|---|
| 1  | Roles and                 | <a href="#">#5b</a> | Name and contact information for the trial sponsor       | 1 |
| 2  | responsibilities:         |                     |                                                          |   |
| 3  | sponsor contact           |                     |                                                          |   |
| 4  | information               |                     |                                                          |   |
| 5  |                           |                     |                                                          |   |
| 6  |                           |                     |                                                          |   |
| 7  |                           |                     |                                                          |   |
| 8  | Roles and                 | <a href="#">#5c</a> | Role of study sponsor and funders, if any, in study      | 3 |
| 9  | responsibilities:         |                     | design; collection, management, analysis, and            |   |
| 10 | sponsor and funder        |                     | interpretation of data; writing of the report; and the   |   |
| 11 |                           |                     | decision to submit the report for publication, including |   |
| 12 |                           |                     | whether they will have ultimate authority over any of    |   |
| 13 |                           |                     | these activities                                         |   |
| 14 |                           |                     |                                                          |   |
| 15 |                           |                     |                                                          |   |
| 16 |                           |                     |                                                          |   |
| 17 | Roles and                 | <a href="#">#5d</a> | Composition, roles, and responsibilities of the          | 3 |
| 18 | responsibilities:         |                     | coordinating centre, steering committee, endpoint        |   |
| 19 | committees                |                     | adjudication committee, data management team, and        |   |
| 20 |                           |                     | other individuals or groups overseeing the trial, if     |   |
| 21 |                           |                     | applicable (see Item 21a for data monitoring committee)  |   |
| 22 |                           |                     |                                                          |   |
| 23 |                           |                     |                                                          |   |
| 24 |                           |                     |                                                          |   |
| 25 |                           |                     |                                                          |   |
| 26 | <b>Introduction</b>       |                     |                                                          |   |
| 27 |                           |                     |                                                          |   |
| 28 | Background and            | <a href="#">#6a</a> | Description of research question and justification for   | 5 |
| 29 | rationale                 |                     | undertaking the trial, including summary of relevant     |   |
| 30 |                           |                     | studies (published and unpublished) examining benefits   |   |
| 31 |                           |                     | and harms for each intervention                          |   |
| 32 |                           |                     |                                                          |   |
| 33 |                           |                     |                                                          |   |
| 34 |                           |                     |                                                          |   |
| 35 | Background and            | <a href="#">#6b</a> | Explanation for choice of comparators                    | 5 |
| 36 | rationale: choice of      |                     |                                                          |   |
| 37 | comparators               |                     |                                                          |   |
| 38 |                           |                     |                                                          |   |
| 39 |                           |                     |                                                          |   |
| 40 | Objectives                | <a href="#">#7</a>  | Specific objectives or hypotheses                        | 6 |
| 41 |                           |                     |                                                          |   |
| 42 |                           |                     |                                                          |   |
| 43 | Trial design              | <a href="#">#8</a>  | Description of trial design including type of trial (eg, | 6 |
| 44 |                           |                     | parallel group, crossover, factorial, single group),     |   |
| 45 |                           |                     | allocation ratio, and framework (eg, superiority,        |   |
| 46 |                           |                     | equivalence, non-inferiority, exploratory)               |   |
| 47 |                           |                     |                                                          |   |
| 48 |                           |                     |                                                          |   |
| 49 | <b>Methods:</b>           |                     |                                                          |   |
| 50 | <b>Participants,</b>      |                     |                                                          |   |
| 51 | <b>interventions, and</b> |                     |                                                          |   |
| 52 | <b>outcomes</b>           |                     |                                                          |   |
| 53 |                           |                     |                                                          |   |
| 54 |                           |                     |                                                          |   |
| 55 |                           |                     |                                                          |   |
| 56 | Study setting             | <a href="#">#9</a>  | Description of study settings (eg, community clinic,     | 6 |
| 57 |                           |                     | academic hospital) and list of countries where data will |   |
| 58 |                           |                     |                                                          |   |
| 59 |                           |                     |                                                          |   |
| 60 |                           |                     |                                                          |   |

be collected. Reference to where list of study sites can be obtained

|    |                                 |                      |                                                                                                                                                                                                                                                                                                                                                                                |
|----|---------------------------------|----------------------|--------------------------------------------------------------------------------------------------------------------------------------------------------------------------------------------------------------------------------------------------------------------------------------------------------------------------------------------------------------------------------|
| 1  |                                 |                      |                                                                                                                                                                                                                                                                                                                                                                                |
| 2  |                                 |                      |                                                                                                                                                                                                                                                                                                                                                                                |
| 3  |                                 |                      |                                                                                                                                                                                                                                                                                                                                                                                |
| 4  | Eligibility criteria            | <a href="#">#10</a>  | Inclusion and exclusion criteria for participants. If applicable, eligibility criteria for study centres and individuals who will perform the interventions (eg, surgeons, psychotherapists)                                                                                                                                                                                   |
| 5  |                                 |                      |                                                                                                                                                                                                                                                                                                                                                                                |
| 6  |                                 |                      |                                                                                                                                                                                                                                                                                                                                                                                |
| 7  |                                 |                      |                                                                                                                                                                                                                                                                                                                                                                                |
| 8  |                                 |                      |                                                                                                                                                                                                                                                                                                                                                                                |
| 9  |                                 |                      |                                                                                                                                                                                                                                                                                                                                                                                |
| 10 |                                 |                      |                                                                                                                                                                                                                                                                                                                                                                                |
| 11 | Interventions: description      | <a href="#">#11a</a> | Interventions for each group with sufficient detail to allow replication, including how and when they will be administered                                                                                                                                                                                                                                                     |
| 12 |                                 |                      |                                                                                                                                                                                                                                                                                                                                                                                |
| 13 |                                 |                      |                                                                                                                                                                                                                                                                                                                                                                                |
| 14 |                                 |                      |                                                                                                                                                                                                                                                                                                                                                                                |
| 15 |                                 |                      |                                                                                                                                                                                                                                                                                                                                                                                |
| 16 | Interventions: modifications    | <a href="#">#11b</a> | Criteria for discontinuing or modifying allocated interventions for a given trial participant (eg, drug dose change in response to harms, participant request, or improving / worsening disease)                                                                                                                                                                               |
| 17 |                                 |                      |                                                                                                                                                                                                                                                                                                                                                                                |
| 18 |                                 |                      |                                                                                                                                                                                                                                                                                                                                                                                |
| 19 |                                 |                      |                                                                                                                                                                                                                                                                                                                                                                                |
| 20 |                                 |                      |                                                                                                                                                                                                                                                                                                                                                                                |
| 21 |                                 |                      |                                                                                                                                                                                                                                                                                                                                                                                |
| 22 |                                 |                      |                                                                                                                                                                                                                                                                                                                                                                                |
| 23 | Interventions: adherence        | <a href="#">#11c</a> | Strategies to improve adherence to intervention protocols, and any procedures for monitoring adherence (eg, drug tablet return; laboratory tests)                                                                                                                                                                                                                              |
| 24 |                                 |                      |                                                                                                                                                                                                                                                                                                                                                                                |
| 25 |                                 |                      |                                                                                                                                                                                                                                                                                                                                                                                |
| 26 |                                 |                      |                                                                                                                                                                                                                                                                                                                                                                                |
| 27 |                                 |                      |                                                                                                                                                                                                                                                                                                                                                                                |
| 28 | Interventions: concomitant care | <a href="#">#11d</a> | Relevant concomitant care and interventions that are permitted or prohibited during the trial                                                                                                                                                                                                                                                                                  |
| 29 |                                 |                      |                                                                                                                                                                                                                                                                                                                                                                                |
| 30 |                                 |                      |                                                                                                                                                                                                                                                                                                                                                                                |
| 31 |                                 |                      |                                                                                                                                                                                                                                                                                                                                                                                |
| 32 | Outcomes                        | <a href="#">#12</a>  | Primary, secondary, and other outcomes, including the specific measurement variable (eg, systolic blood pressure), analysis metric (eg, change from baseline, final value, time to event), method of aggregation (eg, median, proportion), and time point for each outcome. Explanation of the clinical relevance of chosen efficacy and harm outcomes is strongly recommended |
| 33 |                                 |                      |                                                                                                                                                                                                                                                                                                                                                                                |
| 34 |                                 |                      |                                                                                                                                                                                                                                                                                                                                                                                |
| 35 |                                 |                      |                                                                                                                                                                                                                                                                                                                                                                                |
| 36 |                                 |                      |                                                                                                                                                                                                                                                                                                                                                                                |
| 37 |                                 |                      |                                                                                                                                                                                                                                                                                                                                                                                |
| 38 |                                 |                      |                                                                                                                                                                                                                                                                                                                                                                                |
| 39 |                                 |                      |                                                                                                                                                                                                                                                                                                                                                                                |
| 40 |                                 |                      |                                                                                                                                                                                                                                                                                                                                                                                |
| 41 |                                 |                      |                                                                                                                                                                                                                                                                                                                                                                                |
| 42 |                                 |                      |                                                                                                                                                                                                                                                                                                                                                                                |
| 43 | Participant timeline            | <a href="#">#13</a>  | Time schedule of enrolment, interventions (including any run-ins and washouts), assessments, and visits for participants. A schematic diagram is highly recommended (see Figure)                                                                                                                                                                                               |
| 44 |                                 |                      |                                                                                                                                                                                                                                                                                                                                                                                |
| 45 |                                 |                      |                                                                                                                                                                                                                                                                                                                                                                                |
| 46 |                                 |                      |                                                                                                                                                                                                                                                                                                                                                                                |
| 47 |                                 |                      |                                                                                                                                                                                                                                                                                                                                                                                |
| 48 |                                 |                      |                                                                                                                                                                                                                                                                                                                                                                                |
| 49 |                                 |                      |                                                                                                                                                                                                                                                                                                                                                                                |
| 50 | Sample size                     | <a href="#">#14</a>  | Estimated number of participants needed to achieve study objectives and how it was determined, including clinical and statistical assumptions supporting any sample size calculations                                                                                                                                                                                          |
| 51 |                                 |                      |                                                                                                                                                                                                                                                                                                                                                                                |
| 52 |                                 |                      |                                                                                                                                                                                                                                                                                                                                                                                |
| 53 |                                 |                      |                                                                                                                                                                                                                                                                                                                                                                                |
| 54 |                                 |                      |                                                                                                                                                                                                                                                                                                                                                                                |
| 55 |                                 |                      |                                                                                                                                                                                                                                                                                                                                                                                |
| 56 |                                 |                      |                                                                                                                                                                                                                                                                                                                                                                                |
| 57 | Recruitment                     | <a href="#">#15</a>  | Strategies for achieving adequate participant enrolment to reach target sample size                                                                                                                                                                                                                                                                                            |
| 58 |                                 |                      |                                                                                                                                                                                                                                                                                                                                                                                |
| 59 |                                 |                      |                                                                                                                                                                                                                                                                                                                                                                                |
| 60 |                                 |                      |                                                                                                                                                                                                                                                                                                                                                                                |

1 **Methods:**

2 **Assignment of**  
3 **interventions (for**  
4 **controlled trials)**  
5  
6

|    |                      |                      |                                                           |
|----|----------------------|----------------------|-----------------------------------------------------------|
| 7  |                      |                      |                                                           |
| 8  | Allocation: sequence | <a href="#">#16a</a> | Method of generating the allocation sequence (eg,         |
| 9  | generation           |                      | computer-generated random numbers), and list of any       |
| 10 |                      |                      | factors for stratification. To reduce predictability of a |
| 11 |                      |                      | random sequence, details of any planned restriction (eg,  |
| 12 |                      |                      | blocking) should be provided in a separate document       |
| 13 |                      |                      | that is unavailable to those who enrol participants or    |
| 14 |                      |                      | assign interventions                                      |
| 15 |                      |                      |                                                           |
| 16 |                      |                      |                                                           |
| 17 |                      |                      |                                                           |
| 18 |                      |                      |                                                           |
| 19 | Allocation           | <a href="#">#16b</a> | Mechanism of implementing the allocation sequence         |
| 20 | concealment          |                      | (eg, central telephone; sequentially numbered, opaque,    |
| 21 | mechanism            |                      | sealed envelopes), describing any steps to conceal the    |
| 22 |                      |                      | sequence until interventions are assigned                 |
| 23 |                      |                      |                                                           |
| 24 |                      |                      |                                                           |
| 25 |                      |                      |                                                           |
| 26 | Allocation:          | <a href="#">#16c</a> | Who will generate the allocation sequence, who will       |
| 27 | implementation       |                      | enrol participants, and who will assign participants to   |
| 28 |                      |                      | interventions                                             |
| 29 |                      |                      |                                                           |
| 30 |                      |                      |                                                           |
| 31 | Blinding (masking)   | <a href="#">#17a</a> | Who will be blinded after assignment to interventions     |
| 32 |                      |                      | (eg, trial participants, care providers, outcome          |
| 33 |                      |                      | assessors, data analysts), and how                        |
| 34 |                      |                      |                                                           |
| 35 |                      |                      |                                                           |
| 36 | Blinding (masking):  | <a href="#">#17b</a> | If blinded, circumstances under which unblinding is       |
| 37 | emergency unblinding |                      | permissible, and procedure for revealing a participant's  |
| 38 |                      |                      | allocated intervention during the trial                   |
| 39 |                      |                      |                                                           |
| 40 |                      |                      |                                                           |
| 41 |                      |                      |                                                           |

42 **Methods: Data**  
43 **collection,**  
44 **management, and**  
45 **analysis**  
46  
47

|    |                      |                      |                                                             |
|----|----------------------|----------------------|-------------------------------------------------------------|
| 48 |                      |                      |                                                             |
| 49 | Data collection plan | <a href="#">#18a</a> | Plans for assessment and collection of outcome,             |
| 50 |                      |                      | baseline, and other trial data, including any related       |
| 51 |                      |                      | processes to promote data quality (eg, duplicate            |
| 52 |                      |                      | measurements, training of assessors) and a description      |
| 53 |                      |                      | of study instruments (eg, questionnaires, laboratory        |
| 54 |                      |                      | tests) along with their reliability and validity, if known. |
| 55 |                      |                      | Reference to where data collection forms can be found,      |
| 56 |                      |                      |                                                             |
| 57 |                      |                      |                                                             |
| 58 |                      |                      |                                                             |
| 59 |                      |                      |                                                             |
| 60 |                      |                      |                                                             |

if not in the protocol

|    |                            |                      |                                                              |
|----|----------------------------|----------------------|--------------------------------------------------------------|
| 1  |                            |                      |                                                              |
| 2  |                            |                      |                                                              |
| 3  | Data collection plan:      | <a href="#">#18b</a> | Plans to promote participant retention and complete          |
| 4  | retention                  |                      | follow-up, including list of any outcome data to be          |
| 5  |                            |                      | collected for participants who discontinue or deviate        |
| 6  |                            |                      | from intervention protocols                                  |
| 7  |                            |                      |                                                              |
| 8  |                            |                      |                                                              |
| 9  | Data management            | <a href="#">#19</a>  | Plans for data entry, coding, security, and storage,         |
| 10 |                            |                      | including any related processes to promote data quality      |
| 11 |                            |                      | (eg, double data entry; range checks for data values).       |
| 12 |                            |                      | Reference to where details of data management                |
| 13 |                            |                      | procedures can be found, if not in the protocol              |
| 14 |                            |                      |                                                              |
| 15 |                            |                      |                                                              |
| 16 |                            |                      |                                                              |
| 17 | Statistics: outcomes       | <a href="#">#20a</a> | Statistical methods for analysing primary and secondary      |
| 18 |                            |                      | outcomes. Reference to where other details of the            |
| 19 |                            |                      | statistical analysis plan can be found, if not in the        |
| 20 |                            |                      | protocol                                                     |
| 21 |                            |                      |                                                              |
| 22 |                            |                      |                                                              |
| 23 |                            |                      |                                                              |
| 24 | Statistics: additional     | <a href="#">#20b</a> | Methods for any additional analyses (eg, subgroup and        |
| 25 | analyses                   |                      | adjusted analyses)                                           |
| 26 |                            |                      |                                                              |
| 27 |                            |                      |                                                              |
| 28 | Statistics: analysis       | <a href="#">#20c</a> | Definition of analysis population relating to protocol non-  |
| 29 | population and             |                      | adherence (eg, as randomised analysis), and any              |
| 30 | missing data               |                      | statistical methods to handle missing data (eg, multiple     |
| 31 |                            |                      | imputation)                                                  |
| 32 |                            |                      |                                                              |
| 33 |                            |                      |                                                              |
| 34 |                            |                      |                                                              |
| 35 | <b>Methods: Monitoring</b> |                      |                                                              |
| 36 |                            |                      |                                                              |
| 37 | Data monitoring:           | <a href="#">#21a</a> | Composition of data monitoring committee (DMC);              |
| 38 | formal committee           |                      | summary of its role and reporting structure; statement of    |
| 39 |                            |                      | whether it is independent from the sponsor and               |
| 40 |                            |                      | competing interests; and reference to where further          |
| 41 |                            |                      | details about its charter can be found, if not in the        |
| 42 |                            |                      | protocol. Alternatively, an explanation of why a DMC is      |
| 43 |                            |                      | not needed                                                   |
| 44 |                            |                      |                                                              |
| 45 |                            |                      |                                                              |
| 46 |                            |                      |                                                              |
| 47 |                            |                      |                                                              |
| 48 | Data monitoring:           | <a href="#">#21b</a> | Description of any interim analyses and stopping             |
| 49 | interim analysis           |                      | guidelines, including who will have access to these          |
| 50 |                            |                      | interim results and make the final decision to terminate     |
| 51 |                            |                      | the trial                                                    |
| 52 |                            |                      |                                                              |
| 53 |                            |                      |                                                              |
| 54 |                            |                      |                                                              |
| 55 | Harms                      | <a href="#">#22</a>  | Plans for collecting, assessing, reporting, and managing     |
| 56 |                            |                      | solicited and spontaneously reported adverse events          |
| 57 |                            |                      | and other unintended effects of trial interventions or trial |
| 58 |                            |                      |                                                              |
| 59 |                            |                      |                                                              |
| 60 |                            |                      |                                                              |

conduct

|    |                          |                      |                                                               |
|----|--------------------------|----------------------|---------------------------------------------------------------|
| 1  |                          |                      |                                                               |
| 2  |                          |                      |                                                               |
| 3  | Auditing                 | <a href="#">#23</a>  | Frequency and procedures for auditing trial conduct, if NA    |
| 4  |                          |                      | any, and whether the process will be independent from         |
| 5  |                          |                      | investigators and the sponsor                                 |
| 6  |                          |                      |                                                               |
| 7  |                          |                      |                                                               |
| 8  | <b>Ethics and</b>        |                      |                                                               |
| 9  | <b>dissemination</b>     |                      |                                                               |
| 10 |                          |                      |                                                               |
| 11 | Research ethics          | <a href="#">#24</a>  | Plans for seeking research ethics committee / 12              |
| 12 | approval                 |                      | institutional review board (REC / IRB) approval               |
| 13 |                          |                      |                                                               |
| 14 |                          |                      |                                                               |
| 15 | Protocol amendments      | <a href="#">#25</a>  | Plans for communicating important protocol 12                 |
| 16 |                          |                      | modifications (eg, changes to eligibility criteria,           |
| 17 |                          |                      | outcomes, analyses) to relevant parties (eg,                  |
| 18 |                          |                      | investigators, REC / IRBs, trial participants, trial          |
| 19 |                          |                      | registries, journals, regulators)                             |
| 20 |                          |                      |                                                               |
| 21 |                          |                      |                                                               |
| 22 |                          |                      |                                                               |
| 23 |                          |                      |                                                               |
| 24 | Consent or assent        | <a href="#">#26a</a> | Who will obtain informed consent or assent from 12            |
| 25 |                          |                      | potential trial participants or authorised surrogates, and    |
| 26 |                          |                      | how (see Item 32)                                             |
| 27 |                          |                      |                                                               |
| 28 |                          |                      |                                                               |
| 29 | Consent or assent:       | <a href="#">#26b</a> | Additional consent provisions for collection and use of 12    |
| 30 | ancillary studies        |                      | participant data and biological specimens in ancillary        |
| 31 |                          |                      | studies, if applicable                                        |
| 32 |                          |                      |                                                               |
| 33 |                          |                      |                                                               |
| 34 | Confidentiality          | <a href="#">#27</a>  | How personal information about potential and enrolled 12      |
| 35 |                          |                      | participants will be collected, shared, and maintained in     |
| 36 |                          |                      | order to protect confidentiality before, during, and after    |
| 37 |                          |                      | the trial                                                     |
| 38 |                          |                      |                                                               |
| 39 |                          |                      |                                                               |
| 40 |                          |                      |                                                               |
| 41 | Declaration of           | <a href="#">#28</a>  | Financial and other competing interests for principal 13      |
| 42 | interests                |                      | investigators for the overall trial and each study site       |
| 43 |                          |                      |                                                               |
| 44 |                          |                      |                                                               |
| 45 | Data access              | <a href="#">#29</a>  | Statement of who will have access to the final trial 13       |
| 46 |                          |                      | dataset, and disclosure of contractual agreements that        |
| 47 |                          |                      | limit such access for investigators                           |
| 48 |                          |                      |                                                               |
| 49 |                          |                      |                                                               |
| 50 | Ancillary and post trial | <a href="#">#30</a>  | Provisions, if any, for ancillary and post-trial care, and 13 |
| 51 | care                     |                      | for compensation to those who suffer harm from trial          |
| 52 |                          |                      | participation                                                 |
| 53 |                          |                      |                                                               |
| 54 |                          |                      |                                                               |
| 55 |                          |                      |                                                               |
| 56 | Dissemination policy:    | <a href="#">#31a</a> | Plans for investigators and sponsor to communicate trial 13   |
| 57 | trial results            |                      | results to participants, healthcare professionals, the        |
| 58 |                          |                      | public, and other relevant groups (eg, via publication,       |
| 59 |                          |                      |                                                               |
| 60 |                          |                      |                                                               |

reporting in results databases, or other data sharing arrangements), including any publication restrictions

|                                             |                      |                                                                                                                 |    |
|---------------------------------------------|----------------------|-----------------------------------------------------------------------------------------------------------------|----|
| Dissemination policy: authorship            | <a href="#">#31b</a> | Authorship eligibility guidelines and any intended use of professional writers                                  | 13 |
| Dissemination policy: reproducible research | <a href="#">#31c</a> | Plans, if any, for granting public access to the full protocol, participant-level dataset, and statistical code | 13 |

## Appendices

|                            |                     |                                                                                                                                                                                                |                        |
|----------------------------|---------------------|------------------------------------------------------------------------------------------------------------------------------------------------------------------------------------------------|------------------------|
| Informed consent materials | <a href="#">#32</a> | Model consent form and other related documentation given to participants and authorised surrogates                                                                                             | Appendix 1             |
| Biological specimens       | <a href="#">#33</a> | Plans for collection, laboratory evaluation, and storage of biological specimens for genetic or molecular analysis in the current trial and for future use in ancillary studies, if applicable | Appendix 2, appendix 3 |

## Notes:

- 33: Appendix 2, appendix 3 The SPIRIT Explanation and Elaboration paper is distributed under the terms of the Creative Commons Attribution License CC-BY-NC. This checklist was completed on 08. May 2023 using <https://www.goodreports.org/>, a tool made by the [EQUATOR Network](#) in collaboration with [Penelope.ai](#)

# BMJ Open

**Protocol: Changes in weight, body composition and metabolic parameters after switch to dolutegravir/lamivudine compared to continued treatment with dolutegravir/abacavir/lamivudine for virologically suppressed HIV infection (The AVERTAS trial): A randomized open-label superiority trial in Copenhagen, Denmark**

|                                 |                                                                                                                                                                                                                                                                                                                                                                                                                                                                                                                                                                                                                                                                                                                                                                                                                                                                                                                                                                                                               |
|---------------------------------|---------------------------------------------------------------------------------------------------------------------------------------------------------------------------------------------------------------------------------------------------------------------------------------------------------------------------------------------------------------------------------------------------------------------------------------------------------------------------------------------------------------------------------------------------------------------------------------------------------------------------------------------------------------------------------------------------------------------------------------------------------------------------------------------------------------------------------------------------------------------------------------------------------------------------------------------------------------------------------------------------------------|
| Journal:                        | <i>BMJ Open</i>                                                                                                                                                                                                                                                                                                                                                                                                                                                                                                                                                                                                                                                                                                                                                                                                                                                                                                                                                                                               |
| Manuscript ID                   | bmjopen-2023-075673.R1                                                                                                                                                                                                                                                                                                                                                                                                                                                                                                                                                                                                                                                                                                                                                                                                                                                                                                                                                                                        |
| Article Type:                   | Protocol                                                                                                                                                                                                                                                                                                                                                                                                                                                                                                                                                                                                                                                                                                                                                                                                                                                                                                                                                                                                      |
| Date Submitted by the Author:   | 12-Jul-2023                                                                                                                                                                                                                                                                                                                                                                                                                                                                                                                                                                                                                                                                                                                                                                                                                                                                                                                                                                                                   |
| Complete List of Authors:       | <p>Pedersen, Karen; Hvidovre Hospital, Department of Infectious Diseases<br/> Knudsen, Andreas; Bispebjerg Hospital, Department of Respiratory medicine and infectious diseases, Copenhagen University Hospital – Bispebjerg<br/> Møller, Søren ; University of Copenhagen, Clinical Medicine; Hvidovre Hospital Funktions- og Billeddiagnostisk Enhed<br/> Siebner, Hartwig; Hvidovre Hospital MRI Research Section, Danish Research Centre for Magnetic Resonance, Center for Functional and Diagnostic Imaging and Research; University of Copenhagen Faculty of Health and Medical Sciences, Department of Neurology<br/> Hove, Jens; Hvidovre Hospital, Department of Cardiology; University of Copenhagen, Center of Functional Imaging and Research,<br/> Gerstoff, Jan; Rigshospitalet, Department of Infectious Diseases; University of Copenhagen<br/> Benfield, Thomas ; Hvidovre Hospital, Department of Infectious Diseases; University of Copenhagen Faculty of Health and Medical Sciences</p> |
| <b>Primary Subject Heading</b>: | Infectious diseases                                                                                                                                                                                                                                                                                                                                                                                                                                                                                                                                                                                                                                                                                                                                                                                                                                                                                                                                                                                           |
| Secondary Subject Heading:      | HIV/AIDS                                                                                                                                                                                                                                                                                                                                                                                                                                                                                                                                                                                                                                                                                                                                                                                                                                                                                                                                                                                                      |
| Keywords:                       | Obesity, INFECTIOUS DISEASES, VIROLOGY, HIV & AIDS < INFECTIOUS DISEASES, Other metabolic, e.g. iron, porphyria < DIABETES & ENDOCRINOLOGY                                                                                                                                                                                                                                                                                                                                                                                                                                                                                                                                                                                                                                                                                                                                                                                                                                                                    |
|                                 |                                                                                                                                                                                                                                                                                                                                                                                                                                                                                                                                                                                                                                                                                                                                                                                                                                                                                                                                                                                                               |

SCHOLARONE™  
Manuscripts



1  
2  
3  
4  
5  
6  
7  
8  
9  
10  
11  
12  
13  
14  
15  
16  
17  
18  
19  
20  
21  
22  
23  
24  
25  
26  
27  
28  
29  
30  
31  
32  
33  
34  
35  
36  
37  
38  
39  
40  
41  
42  
43  
44  
45  
46  
47  
48  
49  
50  
51  
52  
53  
54  
55  
56  
57  
58  
59  
60

## 1 TITLE

2 Protocol: Changes in weight, body composition and metabolic parameters  
3 after switch to dolutegravir/lamivudine compared to continued treatment with  
4 dolutegravir/abacavir/lamivudine for virologically suppressed HIV infection  
5 (The AVERTAS trial): A randomized open-label superiority trial in  
6 Copenhagen, Denmark.

7 Karen Brorup Heje Pedersen<sup>1</sup>, Andreas Knudsen<sup>2</sup>, Søren Møller<sup>3,4</sup>, Hartwig Roman Siebner<sup>3,5</sup>, Jens  
8 Dahlgaard Hove<sup>3,6</sup>, Jan Gerstoft<sup>7</sup> and Thomas Benfield<sup>1,3</sup>

## 9 Corresponding Author

10 Karen Brorup Heje Pedersen, MD<sup>1</sup>

11 [Karen.brorup.heje.pedersen@regionh.dk](mailto:Karen.brorup.heje.pedersen@regionh.dk)

## 12 Affiliations

13 <sup>1</sup>Departments of Infectious diseases, <sup>4</sup>Clinical Physiology and Nuclear Medicine, <sup>5</sup>Danish Research  
14 Centre for Magnetic Resonance, and <sup>6</sup>Cardiology, Copenhagen University Hospital – Amager and  
15 Hvidovre

16 Kettegaard Allé 30, DK-2650 Hvidovre, Denmark

17 <sup>2</sup> Department of Respiratory medicine and infectious diseases, Copenhagen University Hospital –  
18 Bispebjerg

19 Bispebjerg Bakke 23, DK-2400 Copenhagen, Denmark

1  
2  
3  
4  
5 20 <sup>3</sup> Department of Clinical Medicine, Faculty of Health and Medical Sciences, University of  
6  
7 21 Copenhagen, Blegdamsvej 3B, 2200 Copenhagen N, Denmark  
8  
9

10 22 <sup>7</sup> Department of Infectious Diseases, Copenhagen University Hospital – Rigshospitalet  
11  
12  
13 23 Blegdamsvej 9, DK-2100 Copenhagen, Denmark  
14  
15

## 16 24 **Registration**

17  
18 25 Protocol version: Awaiting amendment approval, protocol version 9.0 April 04, 2023  
19

20  
21 26 Ethics Committee of the Capital Region, Denmark (H-20011433)  
22

23  
24 27 Danish Medicines Agency (EudraCT no. 2019-004999-19)  
25

26  
27 28 Regional Data Protection Centre (P-2020-207)  
28

29  
30 29 [clinicaltrials.gov](https://clinicaltrials.gov) (NCT04904406)  
31  
32

## 33 30 **Roles and Responsibility: Sponsor Contact Information**

### 34 31 **Sponsor**

35  
36 32 Thomas Benfield, MD, DMSc, professor  
37

38  
39  
40 33 Department of Infectious diseases, Copenhagen University Hospital – Amager and Hvidovre  
41

42  
43 34 Kettegaard Allé 30, DK-2650 Hvidovre, Denmark  
44

45  
46 35 [thomas.lars.benfield@regionh.dk](mailto:thomas.lars.benfield@regionh.dk)  
47  
48  
49

## 50 36 **Roles and responsibilities: Sponsor and Funder**

51  
52 37 The study is a Sponsor-Investigator trial. The sponsor, Thomas Benfield has no conflicts of interest  
53  
54 38 or commercial interest in the study. Sponsor and investigators are independent of economic or  
55  
56 39 competing interests. The grant is held in a foundation account managed by sponsor. Participants will  
57  
58  
59  
60

1  
2  
3  
4  
5 40 not be financially compensated. Study results will be utilized only for scientific and public purpose  
6  
7 41 and do not hold any commercial significance.  
8  
9

## 10 42 **Word Count**

11  
12 43 3828  
13

## 14 44 **Key Words**

15  
16 45 Randomized controlled trial, RCT, HIV, antiretroviral therapy, weight, obesity, cardiovascular  
17  
18 46 disease, Cardiac Magnetic Resonance, CMRI  
19  
20

## 21 47 **Abstract**

### 22 48 **Introduction**

23  
24 48  
25 49 With longer life expectancy in people living with HIV (PLWH) on antiretroviral therapy, cardiovascular  
26  
27  
28 50 disease (CVD) has become a common cause of mortality. Abacavir has been associated with an  
29  
30 51 increased risk of myocardial infarction, but the mechanism is unknown. Additionally, abacavir may  
31  
32  
33 52 be obesogenic which could mediate an additional risk factor of CVD. We aim to investigate if  
34  
35 53 discontinuation of abacavir will have a favorable impact on body weight and cardiac parameters in  
36  
37 54 PLWH.  
38  
39

### 40 55 **Methods and Analysis**

41 55  
42 56 Randomized, controlled, superiority trial of virologically suppressed PLWH on dolutegravir, abacavir  
43  
44  
45 57 and lamivudine (DTG/ABC/3TC) for  $\geq 6$  months. In total, 70 PLWH will be randomized 1:2 to either  
46  
47 58 continue DTG/ABC/3TC or to switch to dolutegravir and lamivudine (DTG/3TC) providing the power  
48  
49  
50 59 of 80% at alpha 5% to detect a mean difference in weight change of 2 kg ( $\Delta$ ) given a standard  
51  
52 60 deviation of 2.7 kg. Follow-up will be 48 weeks. Data will be collected at baseline and week 48.  
53  
54 61 Primary outcome will be change in mean bodyweight from baseline to week 24 and 48 evaluated in  
55  
56  
57 62 a linear mixed model. Secondary outcomes will be changes in cardiac-, inflammatory- and metabolic  
58  
59  
60

1  
2  
3  
4  
5 63 parameters, fat distribution, coagulation, endothelial, platelet function, quality of life and virological  
6  
7 64 control from baseline to week 48. Measurements include computed tomography (CT) of thorax and  
8  
9 65 abdomen, external carotid artery ultrasound, liver elastography and dual energy x-ray  
10  
11 66 absorptiometry (DEXA) and blood analysis. Plasma HIV RNA will be measured at baseline, week 4,  
12  
13  
14 67 24 and 48. Forty participants (20 from each arm) will be included in a sub-study involving cardiac  
15  
16 68 magnetic resonance imaging at baseline and week 48. Twenty non-HIV-infected controls will be  
17  
18  
19 69 included with a single scan to compare with baseline scan data.  
20  
21

## 22 70 **Ethics and Dissemination**

23  
24 71 Result from this study will lead to a better understanding of the association between antiretroviral  
25  
26 72 therapy and the impact on weight and risk of CVD. Findings will be useful for both clinicians and  
27  
28  
29 73 PLWH in the guidance of a more individualized HIV treatment. Results from the main study and the  
30  
31 74 substudies will be submitted for publication in a peer-review journal(s). The AVERTAS study is  
32  
33  
34 75 approved by the Ethics Committee of the Capital Region, Denmark (H-20011433), Danish Medicines  
35  
36 76 Agency (EudraCT no. 2019-004999-19) and Regional Data Protection Centre (P-2020-207). The  
37  
38 77 study is registered at clinicaltrials.gov (NCT04904406). Trial registration:  
39  
40  
41 78 ClinicalTrials.gov Identifier: NCT04904406, registered the 27th of May 2021.  
42  
43  
44

## 45 79 **ARTICLE SUMMARY**

### 46 80 **Strengths and Limitations**

- 47  
48  
49 81
- Study design is randomized controlled multicenter trial which limits confounding
  - The study is limited by the unblinded setting which enables bias
  - The study is carried out in outpatient clinics, where participants receive their usual care. This
- 50  
51  
52 82  
53  
54 83  
55  
56  
57 84 might enhance adherence to study visits  
58  
59  
60

1  
2  
3  
4  
5  
6  
7  
8  
9  
10  
11  
12  
13  
14  
15  
16  
17  
18  
19  
20  
21  
22  
23  
24  
25  
26  
27  
28  
29  
30  
31  
32  
33  
34  
35  
36  
37  
38  
39  
40  
41  
42  
43  
44  
45  
46  
47  
48  
49  
50  
51  
52  
53  
54  
55  
56  
57  
58  
59  
60

## 85 INTRODUCTION

### 86 Background and Rationale

87 The introduction of antiretroviral treatment (ART) with  $\geq 3$  drugs in 1996 changed the prognosis of  
88 HIV infection dramatically. Today, people living with HIV (PLWH) treated with ART has a life  
89 expectancy close to that of the HIV-uninfected population (1). However, this longer life expectancy  
90 has led to higher rates of serious non-AIDS events (SNAE) such as cardiovascular disease (CVD)  
91 (2–4). Today, CVD is the main cause of mortality in PLWH (5). The mechanism is thought to be a  
92 multifactorial interplay between traditional CVD risk factors, HIV specific factors and ART. Studies  
93 have shown a correlation between the use of the nucleoside reverse transcriptase inhibitor (NRTI)  
94 abacavir and myocardial infarction (6–10). The underlying mechanism remains largely unknown but  
95 may include endothelial dysfunction, increased inflammation, platelet activation and platelet/collagen  
96 interactions, all of which can modify CVD risk (11).

97 In recent years, dual therapy as an alternative to traditional 3-drug-regimen (3DR) has emerged as  
98 a HIV treatment option. The combination of XTC/DTG is one of several 2-drug regimens now  
99 recommended in the EACS guidelines (v11.1) and IAS-USA for either initiating ART in ART-naïve  
100 adults with plasma HIV RNA < 500,000 copies/mL and without HBV infection or as a switch option  
101 for individuals with viral suppression (plasma HIVRNA < 50 copies/mL for the past 6 months) (12,13).  
102 These recommendations was supported by data from randomized controlled trials reporting non-  
103 inferiority in achieving or maintaining viral suppression (plasma HIV-RNA 50 copies/mL) in ART  
104 naïve and virally suppressed PLWH, respectively (14–17).

105 Initiating ART per se is associated with weight gain (18–20). Some of this weight gain is thought to  
106 be related to a “return-to-health” phenomenon where initiation of ART causes a return to baseline  
107 weight after HIV induced wasting. This mechanism is not fully understood and seems to be only

1  
2  
3  
4  
5 108 partly responsible for the observed weight gain. A meta-analysis of 8 RCTs reported that weight  
6  
7 109 increased more in ART-naïve PLWH initiating treatment with an integrase strand transfer inhibitor  
8  
9 110 (INSTI)-based regimen as compared to a non-NRTI or a protease inhibitor-based regimen. Among  
10  
11  
12 111 NRTIs, abacavir and tenofovir alafenamide (TAF), were associated with more weight gain than  
13  
14 112 tenofovir disoproxil fumarate (TDF) or zidovudine (21). Weight gain after ART switch is modest and  
15  
16 113 it remains uncertain whether this is due to the loss of a weight suppressive effect of prior regimens  
17  
18  
19 114 with older agent such as TDF or efavirenz or a weight gain effect of the newer regimens especially  
20  
21 115 TAF and/or INSTI, or both (22). Overweight and obesity are associated with an increased risk of  
22  
23  
24 116 metabolic syndrome, diabetes, hypertension and dyslipidaemia that converge as risk factors for CVD  
25  
26 117 including myocardial infarction (23). Thus, it is conceivable that there could be synergistic effects  
27  
28  
29 118 and a higher overall risk of CVD using abacavir and dolutegravir in combination. We want to  
30  
31 119 investigate the effect on weight change and cardiac function after discontinuation of abacavir in  
32  
33 120 PLWH treated with abacavir, lamivudine and dolutegravir.

## 36 121 **Objectives**

38 122 The aim of this study is to investigate if discontinuing abacavir by switching from a 3-drug (3DR)  
39  
40  
41 123 regimen with dolutegravir, abacavir and lamivudine (DTG/ABC/3TC) to a 2-drug (2DR) regimen with  
42  
43 124 dolutegravir and lamivudine (DTG/3TC) will decrease weight and improve metabolic and cardiac  
44  
45  
46 125 parameters in PLWH.

## 48 126 **Trial Design**

50  
51 127 This study is a randomized, controlled, parallel, open-label, phase 4, interventional trial.  
52  
53  
54  
55  
56  
57  
58  
59  
60

1  
2  
3  
4  
5  
6  
7  
8  
9  
10  
11  
12  
13  
14  
15  
16  
17  
18  
19  
20  
21  
22  
23  
24  
25  
26  
27  
28  
29  
30  
31  
32  
33  
34  
35  
36  
37  
38  
39  
40  
41  
42  
43  
44  
45  
46  
47  
48  
49  
50  
51  
52  
53  
54  
55  
56  
57  
58  
59  
60

## 128 METHODS: PARTICIPANT, INTERVENTIONS, AND OUTCOMES

### 129 Study Design

130 Participants will be recruited from outpatient clinics at the departments of infectious diseases at two  
131 hospitals: Copenhagen University Hospital - Amager and Hvidovre; and Copenhagen University  
132 Hospital - Rigshospitalet. Both located in the Capital Region of Denmark. Baseline and follow up  
133 study visits and data collection will be performed at Copenhagen University Hospital - Amager and  
134 Hvidovre.

### 135 Eligibility Criteria

136 Inclusion and exclusion criteria are listed in Table 1.

137 **Table 1 Inclusion and Exclusion Criteria**

| Inclusion criteria                                                                                                                                                                                                                                                                                                                                                           | Exclusion criteria                                                                                                                                                                                                                                                                                                                                            |
|------------------------------------------------------------------------------------------------------------------------------------------------------------------------------------------------------------------------------------------------------------------------------------------------------------------------------------------------------------------------------|---------------------------------------------------------------------------------------------------------------------------------------------------------------------------------------------------------------------------------------------------------------------------------------------------------------------------------------------------------------|
| <ul style="list-style-type: none"> <li>Age <math>\geq</math> 18 years</li> <li>HIV infection</li> <li>ongoing treatment with DTG/ABC/3TC <math>\geq</math> 6 months</li> <li>Plasma viral load (HIV-RNA) <math>&lt;</math> 50 copies/ml at inclusion</li> <li>For women with childbearing potential</li> <li>Willingness to use contraceptive during study period</li> </ul> | <ul style="list-style-type: none"> <li>Pre-existing viral resistance to lamivudine or dolutegravir*</li> <li>Presence of hepatitis B antigen (HBsAg) or HBV DNA</li> <li>Cancer within the past five years</li> <li>Pregnancy or breastfeeding (for women)</li> <li>Unstable cardiovascular disease, diabetes (assessed by the treating physician)</li> </ul> |

1  
2  
3  
4  
5 139 Participants will be eligible for a magnetic resonance imaging (MRI) sub-study participation, if they  
6  
7 140 comply to standard MRI safety guidelines.  
8  
9

10 141 \*Existing genotypic resistance test results will be screened prior to inclusion.  
11  
12

## 13 142 **Interventions**

15 143 At day 0 patients will be randomized to either continued therapy with co-formulated dolutegravir 50  
16  
17 144 mg, abacavir 600 mg, and lamivudine 300 mg (Triumeq, control arm) or switch to co-formulated  
18  
19  
20 145 dolutegravir 50 mg and lamivudine 300 mg (Dovato, intervention arm) for 48 weeks. See Figure 1  
21  
22 146 for participant timeline.  
23  
24

## 25 147 **Administration**

27 148 The Investigational Medicinal Products (IMP) will be self-administered in original pharmaceutical  
28  
29  
30 149 packaging by participants once daily. Double controlled administration of the IMP and IMP-log  
31  
32 150 registration will be performed by two designated and GCP-trained study personnel. The study IMP  
33  
34  
35 151 will be distributed at /day 0 and week 24 in original wrapping, with a study specific label. All IMPs  
36  
37 152 are authorized, registered, and marketed by the Danish Medicines Agency and the European  
38  
39 153 Medicines Agency (EMA). Dosage and administration frequency are assigned according to  
40  
41  
42 154 treatment guidelines.  
43  
44

## 45 155 **Withdrawal from study**

47 156 Participants will be withdrawn from the assigned study treatment in case of viral rebound or if any  
48  
49 157 serious adverse reaction (SAE) or suspected unexpected serious adverse reaction (SUSAR)  
50  
51  
52 158 considered to compromise participants safety as assessed by the investigator. Any case of  
53  
54 159 withdrawal will result in an immediate visit, where the study participant will be offered resistance test,  
55  
56 160 and be assigned to a new suppressive HIV regimen. This will be managed by the study team and  
57  
58  
59 161 the participants primary healthcare provider, who will be involved in the decision and further  
60



1  
2  
3  
4  
5  
6  
7  
8  
9  
10  
11  
12  
13  
14  
15  
16  
17  
18  
19  
20  
21  
22  
23  
24  
25  
26  
27  
28  
29  
30  
31  
32  
33  
34  
35  
36  
37  
38  
39  
40  
41  
42  
43  
44  
45  
46  
47  
48  
49  
50  
51  
52  
53  
54  
55  
56  
57  
58  
59  
60

162 monitoring of viral load and participants. Participants withdrawn from the study will be included in the  
163 intention to treat analysis.

## 164 Adherence

165 Adherence will be monitored by measurements of plasma HIV-RNA viral load at baseline, weeks 4  
166 (2DR group only), 24 and 48. Virological failure defined as two consecutive viral loads > 50 copies/ml  
167 with an interval of 14 to 30 days will lead to immediate withdrawal from the study.

168 If participants drop out or are withdrawn, an immediate follow up meeting will be arranged to make  
169 sure patients return to their usual treatment. A resistance test will be performed, and their regular  
170 physician will be informed. Data from withdrawn participants or dropouts will contribute to the  
171 intention to treat analysis. with the patient's acceptance.

## 172 Outcomes

### 173 Primary outcome

- 174 • Change in bodyweight from baseline to week 48 measured as difference between means in  
175 the two study arms

### 176 Secondary outcomes

- 177 • Development of metabolic syndrome at week 48 (24)
- 178 • Development of type 2 diabetes at week 48 (25)
- 179 • Impaired insulin resistance and/or  $\beta$ -cell function determined by changes in HOMA-IR at  
180 week 48 (26)
- 181 • Virological control at week 48 as defined by a plasma HIV-RNA <50 copies/ml

182 Changes from baseline to week 48 in:

- 183 • Self-rated health evaluated by 12-item Short Form Survey (SF-12)
- 184 • Framingham Risk Score (27,28)

- 185 • DAD CVD risk score (29)
- 186 • Blood HbA1c
- 187 • Total plasma cholesterol
- 188 • Plasma High Density lipoprotein cholesterol (HDL-cholesterol)
- 189 • Plasma Low Density Lipoprotein cholesterol (LDL-cholesterol)
- 190 • Plasma Very Low-Density Lipoprotein cholesterol (VLDL-cholesterol)
- 191 • Plasma Triglycerides
- 192 • Visceral adipose tissue (VAT) and subcutaneous adipose tissue (SAT) ratio (abdominal CT)
- 193 • Fat distribution in trunk, limb, and extremities measured by Dual-Energy X-ray Absorption  
194 (DEXA)
- 195 • Development of liver fibrosis or progression of existing liver fibrosis. Significant liver fibrosis  
196 as LSM  $\geq$ 7.6 kPa.
- 197 • Fatty infiltration of the liver evaluated as:
  - 198 ○ Development of steatosis or increase in existing steatosis from baseline (CT liver and  
199 Controlled Attenuated Parameter (CAP) (Fibroscan)
- 200 • Blood pressure
- 201 • Cardiac magnetic resonance imaging (MRI)
- 202 • Carotid artery intima-media thickness (cIMT) measured by ultrasound
- 203 • Coronary artery calcium score (CACs)
- 204 • Plasma N-terminal pro-B-type natriuretic peptide (Pro-BNP)
- 205 • Plasma Troponin T (TnT)
- 206 • Inflammation:
  - 207 ○ Plasma High-sensitive C-reactive protein

1  
2  
3  
4  
5  
6  
7  
8  
9  
10  
11  
12  
13  
14  
15  
16  
17  
18  
19  
20  
21  
22  
23  
24  
25  
26  
27  
28  
29  
30  
31  
32  
33  
34  
35  
36  
37  
38  
39  
40  
41  
42  
43  
44  
45  
46  
47  
48  
49  
50  
51  
52  
53  
54  
55  
56  
57  
58  
59  
60

208 ○ Plasma Interleukin 1 $\beta$

209 ○ Plasma Interleukin 6

210 ● Endothelial function:

211 ○ Plasma Vascular cell adhesion molecule 1

212 ○ Plasma Intercellular adhesion molecule 1

213 ● Platelet function:

214 ○ Plasma Soluble P-selectin

215 ○ Plasma Soluble glycoprotein VI.

216 ● Coagulation:

217 ● Plasma D-dimer

218 ● Plasma coagulations factor 2, 7 and 10 (extrinsic pathway)

219 ● Plasma Fibrinogen

220 ● Blood hemoglobin, leucocyte count, and platelet count

221 ● Plasma creatinine, urea, sodium, potassium, bilirubin, and alanine aminotransferase.

## 222 Outcomes MRI Sub-study

### 223 Primary outcome

224 In the Cardiac MRI (CMRI) sub-study the outcome is a composite endpoint consisting of any

225 abnormalities in

226 ● Extracellular myocardial volume (ECV) from baseline to week 48

227 ● Left atrial volume from baseline to week 48

228 ● Diastolic function from baseline to week 48

229 ● Myocardial mass from baseline to week 48

## 230 Secondary outcomes

### 231 Changes in

- 232 • Left ventricular ejection fraction
- 233 • Myocardial perfusion
- 234 • Myocardial edema/inflammation
- 235 • Myocardial fibrosis
- 236 • Myocardial lipid-water profile

## 238 Participant Timeline

239 Participant timeline is illustrated in Figure 1

## 240 Sample Size

241 The hypothesis on weight change in this study relies on a meta-analysis with pooled weight data  
242 from 8 RCTs of treatment naïve PLWH. In the meta-analysis mean weight gain with abacavir (ABC)  
243 was 3.08 kg (95% CI, 2.36–3.81) in 96 weeks. In the same meta-analysis dolutegravir lead to a mean  
244 weight gain on DTG, 4.07 kg [95% CI, 3.51–4.62] (21).

245 Since dolutegravir treatment continues in both study arms, we hypothesize the possible contribution  
246 from dolutegravir to weight gain will be equal in the groups. We speculate that that the absence of  
247 abacavir in the intervention (2DR) group can lead to a small weight loss in. Anticipated annual weight  
248 change in the two groups are: DTG/3TC + 0 to -1 kg and DTG/ABC/3TC +2 kg. Sample size is  
249 estimated by Student's unpaired t-test. Patients will be randomized 2:1 to intervention or control.

250 Assuming a 2:1 randomization ratio for the intervention and control arm, a significance level ( $\alpha$ ) of  
251 5%, a power ( $\beta$ ) of 80%, mean difference in weight between the two arms of 2 kg ( $\Delta$ ) and a standard  
252 deviation of 2.7 kg the estimated sample size required will be 44 randomized individuals in the

1  
2  
3  
4  
5  
6  
7  
8  
9  
10  
11  
12  
13  
14  
15  
16  
17  
18  
19  
20  
21  
22  
23  
24  
25  
26  
27  
28  
29  
30  
31  
32  
33  
34  
35  
36  
37  
38  
39  
40  
41  
42  
43  
44  
45  
46  
47  
48  
49  
50  
51  
52  
53  
54  
55  
56  
57  
58  
59  
60

253 intervention group and 22 randomized individuals in the control group. To account for a 5%  
254 withdrawal or dropout rate, the sample size will be 70 patients in total.

## 255 **Recruitment**

256 Eligible patients will be identified by treating physicians at outpatient clinics at the involved sites.  
257 Information on eligible patients will be disclosed to the responsible investigator for the purpose of  
258 recruitment. Eligible patients will receive verbal and written study information, and subsequently be  
259 offered participation. All participants must provide written informed consent.

## 260 **Study Status**

261 The first participant was included the 20<sup>th</sup> of October 2020. Recruitment is expected to be completed  
262 by November 2023.

## 263 **METHODS: ASSIGNMENT OF INTERVENTIONS**

### 264 **Allocation**

265 Eligible participants will be randomized in two parallel arms with an allocation ratio of 2:1 to switch  
266 to 2DR therapy with DTG/3TC or to continue 3DR treatment with DTG/ABC/3TC (control). Key  
267 variables will be entered into a secure web-based program (REDCap) to randomize patients into two  
268 parallel arms upon inclusion. The randomization list will be centrally generated in REDCap using  
269 random blocks stratified by study center and sex. Additionally, 40 participants (20 control and 20  
270 intervention) will be invited to participate in the cardiac MRI sub-study. The study will be open label,  
271 both participants and the study personnel will be un-blinded to randomization.

## METHODS: DATA COLLECTION, MANAGEMENT, AND ANALYSIS

### Data Collection Methods

Study visits and data collection will be performed at Copenhagen University Hospital - Amager and Hvidovre and participants will be examined by trained clinicians or study nurses. At the inclusion visit (day 0) baseline data will be collected, and participants will be randomized. Subsequently a safety blood test will be performed at week 4 (for the 2DR arm), and follow-up data will be collected at study visits at week 24 (range 20-28) and finally at week 48 (range 46-52). An overview data collection is listed in Table 2 and 3. Blood testing is listed in Table 4. Detailed description on radiological tests are included in Appendix 1.

Participants must be fasting at least 6 hours prior to visits at day 0, 24 and 48, to ensure fasting measurements of weight, blood tests, transient liver elastography and Dual-Energy X-Ray Absorptiometry.

**Table 2 Data Collection**

|                                     | Day 0 | Week 4 | Week 24 | Week 48 |
|-------------------------------------|-------|--------|---------|---------|
| Informed consent                    | x     |        |         |         |
| Randomization                       | x     |        |         |         |
| Demographics <sup>1</sup>           | x     |        |         |         |
| Framingham risk score               | x     |        | x       | x       |
| SF-12 <sup>2</sup>                  | x     |        | x       | x       |
| Body weight                         | x     |        | x       | x       |
| Waist circumference                 | x     |        | x       | x       |
| Vital signs                         | x     |        | x       | x       |
| Blood tests <sup>4</sup>            | x     |        | x       | x       |
| HIV safety blood tests <sup>5</sup> | x     | x      | x       | x       |

|                                                                |     |  |     |     |
|----------------------------------------------------------------|-----|--|-----|-----|
| Transient elastography / Controlled Attenuated Parameter (CAP) | x   |  | x   | x   |
| CT <sup>6</sup>                                                | (x) |  | (x) | (x) |
| DEXA <sup>7</sup>                                              | x   |  | x   | x   |
| cIMT <sup>8</sup>                                              | x   |  | x   | x   |
| <b>MRI SUB-STUDY</b>                                           |     |  |     |     |
| Cardiac MRI <sup>9</sup>                                       | x   |  |     | x   |
| 24-hours ECG Holter monitoring                                 | x   |  |     | x   |

<sup>1</sup>Age, gender, tobacco use, alcohol consumption, medication, medical history, nursing home residency, and activities of daily living.

<sup>2</sup> 12-item short-form health survey (SF-12)

<sup>3</sup>Blood **pressure**, heart rate, respiration rate, peripheral oxygen saturation, temperature.

<sup>4</sup>**HIV safety blood tests:** Plasma HIV-RNA and CD4 count.

<sup>5</sup>**Blood tests:** leucocytes, platelets, hemoglobin, creatinine, urea, sodium, potassium, bilirubin, alanine aminotransferase, lactate dehydrogenase, erythrocyte fraction. **Metabolism:** Fasting p-glucose, insulin, glycated hemoglobin (HbA1c), total cholesterol, HDL, LDL, VLDL, triglyceride. **Inflammation:** High-sensitive c-reactive protein, interleukin 1 and 6. **Coagulation:** D-dimer, factor 2, 7 and 10, fibrinogen. **Platelet function:** soluble P-selectin, soluble glycoprotein VI. **Endothelial function:** Vascular cell adhesion molecule 1, intercellular adhesion molecule 1, Cardiac: N-terminal pro-B-type natriuretic peptide (Pro-BNP), troponin T (TnT).

<sup>6</sup>Low dose computed tomography of thorax and abdomen to determine coronary artery calcium score (CACs), visceral adipose tissue (VAT), subcutaneous adipose tissue (SAT) and liver steatosis.

<sup>7</sup>Dual energy x-ray absorptiometry, optional

<sup>8</sup>Carotid intima-media thickness (cIMT) determined by ultrasound.

<sup>9</sup>Cardiac magnetic resonance imaging sub-study (optional)

1  
2  
3  
4  
5 302 **Table 3 Clinical Measurements and Methods**

| Measurements                                                         | Description                                                                                                                                                                                                                                                                                                                                                                                                                                                                                                                                                                                                                                                                                            |
|----------------------------------------------------------------------|--------------------------------------------------------------------------------------------------------------------------------------------------------------------------------------------------------------------------------------------------------------------------------------------------------------------------------------------------------------------------------------------------------------------------------------------------------------------------------------------------------------------------------------------------------------------------------------------------------------------------------------------------------------------------------------------------------|
| Body weight                                                          | Measured after minimum 6 hours of fasting and without cloth<br>Scale: Seca 701 7021099                                                                                                                                                                                                                                                                                                                                                                                                                                                                                                                                                                                                                 |
| Blood tests (fasting)                                                | Peripheral venous blood                                                                                                                                                                                                                                                                                                                                                                                                                                                                                                                                                                                                                                                                                |
| Transient liver elastography / Controlled Attenuated Parameter (CAP) | Fibro scan, M-XL probe, (Echosens, Paris, France)                                                                                                                                                                                                                                                                                                                                                                                                                                                                                                                                                                                                                                                      |
| Carotid intima-media thickness (cIMT)                                | Sonosite M-Turbo (Sonosite Inc., Bothell, WA, USA), analysed with a 13.6 MHz linear transducer and automated software (SonoCalc IMT 5.0; Sonosite Inc.)                                                                                                                                                                                                                                                                                                                                                                                                                                                                                                                                                |
| CT scans                                                             | CT chest, CT upper abdomen and Coronary Calcium Scan<br>Aquillion One scanner, Toshiba Medical Systems, (Otawara-shi, Tochigi-ken, Japan)                                                                                                                                                                                                                                                                                                                                                                                                                                                                                                                                                              |
| DEXA scan                                                            | Dual energy X-ray absorptiometry (DEXA)<br>Whole-body DEXA scanning<br>Hologic QDR-2000 W (Bedford, MA, USA)                                                                                                                                                                                                                                                                                                                                                                                                                                                                                                                                                                                           |
| Cardiac MRI                                                          | MAGNETOM Prisma 3 Tesla scan, SIEMENS Healthineers (Erlangen Germany)                                                                                                                                                                                                                                                                                                                                                                                                                                                                                                                                                                                                                                  |
| Metabolic syndrome <sup>1</sup>                                      | Central obesity: waist circumference $\geq 94$ cm for males and $\geq 80$ cm for females (Europids), or BMI $> 30$ kg/m <sup>2</sup> , plus any two of the following four factors: <ul style="list-style-type: none"> <li>• Raised triglycerides: <math>&gt; 1,7</math> mmol/L</li> <li>• Reduced HDL cholesterol: <math>\leq 1,03</math> mmol/L in males, <math>&lt; 1,29</math> mmol/L in females</li> <li>• Raised blood pressure (BP): Systolic BP <math>\geq 130</math> mmHg or diastolic BP <math>\geq 85</math> mmHg or treatment of previously diagnosed hypertension</li> <li>• Raised fasting plasma glucose: <math>\geq 5,6</math> mmol/L or previously diagnosed type2-diabetes</li> </ul> |



|                                                                                 |                                                                                                                                                                                                                                                     |
|---------------------------------------------------------------------------------|-----------------------------------------------------------------------------------------------------------------------------------------------------------------------------------------------------------------------------------------------------|
| Insulin resistance and $\beta$ -cell function                                   | Homeostatic Model Assessment of Insulin Resistance (HOMA-IR):<br>$HOMA - IR = \frac{FPG (mmol/L) \cdot FPI (mU/L)}{22.5}$ $HOMA - \%B = \frac{20 \cdot FPI (mU/L)}{FPG (mmol/L) - 3,5}$                                                             |
| Type 2 diabetes <sup>2</sup>                                                    | <ul style="list-style-type: none"> <li>• Fasting plasma glucose concentration <math>\geq</math> 7.0 mmol/L or</li> <li>• a random venous plasma glucose concentration <math>\geq</math> 11.1 mmol/L or</li> <li>• HbA1c &gt; 48 mmol/mol</li> </ul> |
| Cardiovascular disease risk scores<br>Framingham Risk Score<br>D:A:D risk score | Online calculation tool, CHIP – Centre of Excellence for Health & Framingham Heart Study                                                                                                                                                            |
| Survey                                                                          | <ul style="list-style-type: none"> <li>• 12-Item Short term Survey (SF-12)</li> <li>• Questionnaire on dietary and activity patterns</li> </ul>                                                                                                     |

<sup>1</sup> Metabolic syndrome defined in accordance with The International Diabetes Federations definition

<sup>2</sup> WHO definition

1  
2  
3  
4  
5 305 **Table 4 Blood and Plasma Analysis**

| Category             | Blood and Plasma analysis                                                                                                               |
|----------------------|-----------------------------------------------------------------------------------------------------------------------------------------|
| Hematology           | Leucocyte count and differential count, hemoglobin, hematocrit                                                                          |
| Electrolytes         | Sodium, Potassium                                                                                                                       |
| Renal                | Creatinine, urea, albumin                                                                                                               |
| Liver                | Alanine aminotransferase, aspartate transaminase, bilirubin, lactate dehydrogenase                                                      |
| HIV-safety           | HIV-RNA*, CD4 cell count*                                                                                                               |
| Metabolism           | Glucose, insulin, blood glycated hemoglobin (HbA1c), total cholesterol, HDL-cholesterol, LDL-cholesterol, VLDL-cholesterol (calculated) |
| Inflammation         | High sensitivity C-reactive protein, interleukin 1 $\beta$ and 6*                                                                       |
| Coagulation          | D-dimer, factor II+VII+X, fibrinogen, platelet count                                                                                    |
| Platelet function    | Soluble P-selectin*, Soluble glycoprotein VI*                                                                                           |
| Endothelial function | Vascular cell adhesion molecule 1*, intercellular adhesion, molecule 1*                                                                 |
| Cardiac              | N-terminal pro-B-type natriuretic peptide, Troponin T                                                                                   |

1  
2  
3  
4  
5  
6  
7  
8  
9  
10  
11  
12  
13  
14  
15  
16  
17  
18  
19  
20  
21  
22  
23  
24  
25  
26  
27  
28  
29  
30  
31  
32  
33  
34  
35  
36  
37  
38  
39  
40  
41  
42  
43  
44  
45  
46  
47  
48  
49  
50  
51  
52  
53  
54  
55  
56  
57  
58  
59  
60

|  |  |
|--|--|
|  |  |
|--|--|

306 Blood tests will be performed at visits day 0 week 24 and week 48. Participants will be fasting minimum 6 hours prior to blood tests. Non-  
307 HIV-infected controls will have blood tests prior to- or at the day of CMRI and will not be fasting. Blood analysis with \* will be performed  
308 only in PLWH.

309

For peer review only

## Cardiac MRI Sub-study

Forty participants from the main study, 20 from the 2DR-group and 20 from the 3DR-group, will be included in the CMRI sub-study. Cardiac MRI and ECG-monitoring will be performed on the sub-study population at baseline and week 48. Further, 20 non-HIV-infected controls will be recruited for a single CMRI to compare baseline data. CMRI technical details and scan protocol are elaborated in Appendix 1.

The following clinical information will be obtained from healthy controls or from their patient records: Medicine use, known medical conditions, cardiac risk (smoking status, alcohol consumption, family CVD history), height and weight. Blood pressure and heart rate will be measured at the day of CMRI. Blood tests will be performed prior to- or at the day of CMRI. See Table 4 for blood and plasma testing details.

## Data Management

The participant data including demographics, medical history, laboratory- and investigational results will be recorded in digital eCRFs in Research Electronic Data Capture (REDCap), a secure web application for administration of databases in non-commercial clinical research. Investigators or appointed research nurses will manually enter the data. Only authorized personnel such as the sponsor, investigator, sub-investigator, or study nurses will have encoded access via personal user ID and password. All data will be handled confidentially, in accordance with “The Danish Act on Processing of Personal Data and General Data Protection Regulation” (GDPR). Study data will be published in pseudonymous form only after being extracted by the primary investigator at study termination.

1  
2  
3  
4  
5  
6  
7  
8  
9  
10  
11  
12  
13  
14  
15  
16  
17  
18  
19  
20  
21  
22  
23  
24  
25  
26  
27  
28  
29  
30  
31  
32  
33  
34  
35  
36  
37  
38  
39  
40  
41  
42  
43  
44  
45  
46  
47  
48  
49  
50  
51  
52  
53  
54  
55  
56  
57  
58  
59  
60

## 331 **Statistical Methods**

### 332 **Intention-to-treat (ITT) analysis**

333 The intention-to-treat analysis will include all participants who were randomized, regardless of their  
334 adherence to the assigned treatment or whether they discontinued the treatment. This analysis will  
335 also include participants who were lost to follow-up.

### 336 **Per-protocol analysis (PP)**

337 The per-protocol analysis will only include randomized participants who completed the entire study  
338 and the last follow-up. If participants did not adhere to the assigned treatment but adhered to one of  
339 the two treatment arms, they will be included in the per-protocol analysis with their actual treatment.  
340 However, if participants discontinued the treatment or started a treatment regimen outside the study  
341 protocol, they will only be included in the intention-to-treat analysis.

### 342 **Descriptive Statistics**

343 Baseline characteristics will be presented in Table 1 grouped by treatment arm. Continuous variables  
344 will be presented as median [IQR] or mean and standard deviation (SD) and compared by unpaired  
345 t-test or Mann-Whitney U test depending on distribution of data. Categorical variables will be  
346 presented as number and percentage, groups will be compared with chi-square test or Fisher's exact  
347 test. Cardiac Magnetic Resonance Sub-study data will be presented similarly.

### 348 **Analysis Set**

349 Absolute change in mean fasting weight from baseline to week 24 and from baseline to week 48 will  
350 included in a linear mixed model for analysis of the primary outcome. Continuous secondary  
351 endpoints will be analyzed and presented similarly to the primary analysis of weight change.  
352 Categorical variables will be compared with chi-square test or Fisher's exact test. No interim analysis  
353 is planned.

## Missing Data

Missing data will be analyzed with the assumption that data are “missing at random” (MAR) and analyzed using multiple imputation. At study termination an analysis will be performed to check for pattern of missing data and association between missing and observed data will be performed to ensure missing data is MAR.

## Loss to follow up

Participant who are lost to follow-up including dropouts withdrawing their consent or unreachable participant will be included in the intention to treat analysis. The participant's primary healthcare provider will be informed to ensure that regular monitoring and treatment will be resumed.

## METHODS: MONITORING

### Data Monitoring

External data monitoring will be performed according to ICH-GCP by the public “Danish GCP Units, Copenhagen”. Data collection and handling will be conducted according to a monitoring plan and written standard procedures (SOP) and in accordance with GCP regulations and requirements. There are no planned interim analyses in the study.

### Harms

SAEs and SUSARs will be evaluated and documented by the primary investigator and reported to the sponsor in accordance with GCP and Danish Medicines Agency regulatory. A yearly report including all emerged SAEs) and SUSARs and comments on general safety in the study will be reported to the Danish Medicines Agency. In case of death or life-threatening disease, the sponsor will report the SUSAR to Danish Medicines Agency and the regional Research Health Ethics Committee within 7 days of the sponsor's knowledge of the event. A final report of registered events

1  
2  
3  
4  
5  
6  
7  
8  
9  
10  
11  
12  
13  
14  
15  
16  
17  
18  
19  
20  
21  
22  
23  
24  
25  
26  
27  
28  
29  
30  
31  
32  
33  
34  
35  
36  
37  
38  
39  
40  
41  
42  
43  
44  
45  
46  
47  
48  
49  
50  
51  
52  
53  
54  
55  
56  
57  
58  
59  
60

376 will be generated at study terminations and reported to the Danish Medicines Agency and Health  
377 Research Ethics committee of the Capital Region of Denmark.

## 378 **Patient and Public Involvement statement**

379 Patients/public were not involved until initiation of inclusion in the trial. The research question was  
380 developed in the clinic by clinicians treating the involved patient group. The patients/public were not  
381 involved in the design, conduct or recruitment of the study, but the study was designed to make the  
382 participation as accessible and effortless as possible for patients. Participants will be informed about  
383 the study results by letter at study termination unless the opt this out in the consent form.

## 384 **ETHICS AND DISSEMINATION**

### 385 **Protocol Amendments**

386 Any possible protocol modification will be reported in a protocol amendment to relevant public  
387 authorities.

### 388 **Consent or Assent**

389 All participants will be informed of the study by the means of oral and written information, per usual  
390 ICH standards, with full details of the study, including risk and benefits, before enrollment.  
391 Participants will be informed of the right to obtain an assessor. Only the principal investigator or co-  
392 investigators will be allowed to obtain informed consent from participants. Appendix 2 shows the  
393 informed consent form.

394 An additional consent will be retrieved for a project specific plasma biobank for subsequent analyses  
395 (project specific biobank) and a biobank for future research. Biobank details are listed in Appendix  
396 3.

## Confidentiality

Sponsor and investigators are obliged to handle all data on trial participants confidentially in accordance with the Act on Processing of Personal Data. At the end of the study, the primary investigator will extract data from the electronic database REDCap to perform the planned analyses on primary and secondary outcomes. Data will be processed and analyzed in the free statistic software R Studio. Study data will subsequently be published only in anonymous form. Data will be handled based on Danish law of data protection and Danish data protection regulation.

## Data Access

The study is registered at ClinicalTrials.gov Identifier (NCT04904406, registered the 27th of May 2021). Access to final data will be limited to sponsor, primary investigator and personnel involved in the analysis of data, co-investigator, and statisticians. The data that support the findings of this study are available upon reasonable request. The data are not publicly available due to Danish legislation regarding General Data Protection Regulation.

## Ancillary and post-trial care

All areas of the Danish health care system are covered by a publicly funded compensation scheme. The scheme covers if a participant is injured in connection with treatment at a public hospital. The scheme covers medicinal product injuries. This also applies for patients involved in research. At inclusion, the participants will be informed of the compensation and complaint avenues in case a drug injury occurs, which is in adherence to Danish law.

## Dissemination policy: trial results

Upon the completion of the trial, the data collected from all participating sites will be pooled and analyzed together. Researchers involved in the trial will not be permitted to publish data until after the main study publication is released. The results of the primary study will be featured in a peer-



1  
2  
3  
4  
5  
6  
7  
8  
9  
10  
11  
12  
13  
14  
15  
16  
17  
18  
19  
20  
21  
22  
23  
24  
25  
26  
27  
28  
29  
30  
31  
32  
33  
34  
35  
36  
37  
38  
39  
40  
41  
42  
43  
44  
45  
46  
47  
48  
49  
50  
51  
52  
53  
54  
55  
56  
57  
58  
59  
60

420 reviewed journal, with the primary investigator as the first author, the sponsor as the senior author,  
421 and the participating investigators as co-authors based on their work and involvement in the study.  
422 All findings, whether positive, negative, or inconclusive, will be published. The cardiac MRI sub-study  
423 data will be reported separately.

## LIMITATIONS

425 The main limitation in this study is non-blinding of the intervention which introduces both observer -  
426 and performer bias. We try to minimize the performance bias by not informing the participants what  
427 to expect in terms of weight change with their assigned treatment. Further we limit this bias with a  
428 48 week follow up as a long term study intervention may decrease the probability to adhere to other  
429 weight interventions such as diets or excessive training.

430 We expect high adherence to the study and to the randomization. We only include virally suppressed  
431 PLWH. PLWH are used to adhere to prescribed medication, and they are all treated with the drugs  
432 used at study entry (they either continue three drug and switch to a regimen consisting of two of the  
433 three drugs), thus we expect very few adverse events. The study setup an expected low AE rate is  
434 thought to limit drop out. The randomized controlled design of the study will contribute to even  
435 distribution of bias, non-adherence, and loss to follow up in the groups.

## COMPETING INTERESTS

437 None to declare

## FUNDING

439 The study is supported by the Simonsen's Foundation (No grand number) and from Amager and  
440 Hvidovre Hospital's Research Foundation (grand number: 2021-533). The Funders did not

1  
2  
3  
4  
5 441 contribute to the design of the study, the decision to publish the findings, or the preparation of the  
6  
7 442 manuscript.  
8  
9

## 10 443 **Author Contributions Statement**

11  
12 444 The authors listed have all made contributions to this paper in accordance with the recommendations  
13  
14 445 of the International Committee of Medical Journal Editors (ICMJE). Thomas Benfield (TB), MD,  
15  
16 446 professor, DMSc; Jan Gerstoft (JG), MD, professor DMSc; Andreas Knudsen (AK), MD, DMSc and  
17  
18 447 Karen Brorup Heje Pedersen (KBHP), MD contributed to the study design. Jens Dahlgard Hove  
19  
20 448 (JDH), MD, PhD, MSc, Associate Professor; Hartwig Roman Siebner (HRS), MD, professor, DMSc  
21  
22 449 and Søren Møller (SM), MD, professor, DMSc contributed specifically to the radiological aspects of  
23  
24 450 the protocol, including technical details, setup and access to all radiological examinations. All authors  
25  
26 451 will be involved in the analysis and interpretation of data upon study termination. The primary drafting  
27  
28 452 work was conducted and organized by the corresponding author, KBHP, and the study sponsor, TB.  
29  
30 453 JDH and JDH drafted the CMRI-scan protocol. All authors participated in reviewing the manuscript  
31  
32 454 and providing intellectual input.  
33  
34  
35  
36  
37  
38

39 455 The authors listed have approved the final version of the paper and are willing to participate in any  
40  
41 456 future revisions. All authors (KBHP, AK, SM, HRS, JDH, JG, and TB) take responsibility for the  
42  
43 457 accuracy and integrity of the work and are committed to addressing any concerns that may arise.  
44  
45  
46

47 458 Artificial intelligence (AI)-Assisted Technology, ChatGBT from OpenAI  
48  
49 459 (<https://openai.com/blog/chatgpt>), was used solely for grammatical and linguistic proofreading of the  
50  
51 460 manuscript. No AI was involved in the study design, data analysis, interpretation, or substantial  
52  
53 461 writing and reviewing of the manuscript.  
54  
55  
56  
57  
58  
59  
60

1  
2  
3  
4  
5  
6  
7  
8  
9  
10  
11  
12  
13  
14  
15  
16  
17  
18  
19  
20  
21  
22  
23  
24  
25  
26  
27  
28  
29  
30  
31  
32  
33  
34  
35  
36  
37  
38  
39  
40  
41  
42  
43  
44  
45  
46  
47  
48  
49  
50  
51  
52  
53  
54  
55  
56  
57  
58  
59  
60**REFERENCES**

- 463 1. Lohse N, Obel N. Update of Survival for Persons With HIV Infection in Denmark. *Ann Intern Med.* 2016 Nov 15;165(10):749–50.
- 464 2. Belloso WH, Orellana LC, Grinsztejn B, Madero JS, La Rosa A, Veloso VG, et al. Analysis of  
465 serious non-AIDS events among HIV-infected adults at Latin American sites. *HIV Med.* 2010  
466 Oct 1;11(9):554–64.
- 467 3. Smith CJ, Ryom L, Weber R, Morlat P, Pradier C, Reiss P, et al. Trends in underlying causes  
468 of death in people with HIV from 1999 to 2011 (D:A:D): a multicohort collaboration. *Lancet.*  
469 2014 Jul 19;384(9939):241–8.
- 470 4. Freiberg MS, Chang CCH, Kuller LH, Skanderson M, Lowy E, Kraemer KL, et al. HIV infection  
471 and the risk of acute myocardial infarction. *JAMA Intern Med.* 2013 Apr 22;173(8):614–22.
- 472 5. Feinstein MJ, Bahiru E, Achenbach C, Longenecker CT, Hsue P, So-Armah K, et al. Patterns  
473 of Cardiovascular Mortality for HIV-Infected Adults in the United States: 1999 to 2013. *Am J  
474 Cardiol.* 2016 Jan 15;117(2):214–20.
- 475 6. Sabin CA, Reiss P, Ryom L, Phillips AN, Weber R, Law M, et al. Is there continued evidence  
476 for an association between abacavir usage and myocardial infarction risk in individuals with  
477 HIV? A cohort collaboration. *BMC Med.* 2016 Mar 31;14:61.
- 478 7. Worm SW, Sabin C, Weber R, Reiss P, El-Sadr W, Dabis F, et al. Risk of myocardial infarction  
479 in patients with HIV infection exposed to specific individual antiretroviral drugs from the 3 major  
480 drug classes: the data collection on adverse events of anti-HIV drugs (D:A:D) study. *J Infect  
481 Dis.* 2010 Feb 1;201(3):318–30.
- 482 8. D:A:D Study Group, Sabin CA, Worm SW, Weber R, Reiss P, El-Sadr W, et al. Use of  
483 nucleoside reverse transcriptase inhibitors and risk of myocardial infarction in HIV-infected  
484 patients enrolled in the D:A:D study: a multi-cohort collaboration. *Lancet.* 2008 Apr  
485 26;371(9622):1417–26.
- 486 9. Choi AI, Vittinghoff E, Deeks SG, Weekley CC, Li Y, Shlipak MG. Cardiovascular risks  
487 associated with abacavir and tenofovir exposure in HIV-infected persons. *AIDS.* 2011 Jun  
488 19;25(10):1289–98.

- 1  
2  
3  
4  
5 491 10. Desai M, Joyce V, Bendavid E, Olshen RA, Hlatky M, Chow A, et al. Risk of cardiovascular  
6 492 events associated with current exposure to HIV antiretroviral therapies in a US veteran  
7 population. *Clin Infect Dis*. 2015 Aug 1;61(3):445–52.  
8 493  
9  
10 494 11. O'Halloran JA, Dunne E, Tinago W, Denieffe S, Kenny D, Mallon PWG. Switching from  
11 abacavir to tenofovir disoproxil fumarate is associated with rises in soluble glycoprotein VI,  
12 495 suggesting changes in platelet-collagen interactions. *AIDS*. 2018 24;32(7):861–6.  
13 496  
14  
15  
16 497 12. GmbH B. EACSociety. [cited 2019 Dec 19]. EACS Guidelines. Available from:  
17 <https://www.eacsociety.org/guidelines/eacs-guidelines/eacs-guidelines.html>  
18 498  
19  
20 499 13. Gandhi RT, Bedimo R, Hoy JF, Landovitz RJ, Smith DM, Eaton EF, et al. Antiretroviral Drugs  
21 for Treatment and Prevention of HIV Infection in Adults: 2022 Recommendations of the  
22 500 International Antiviral Society-USA Panel. *JAMA*. 2023 Jan 3;329(1):63–84.  
23 501  
24  
25  
26 502 14. Cahn P, Madero JS, Arribas JR, Antinori A, Ortiz R, Clarke AE, et al. Dolutegravir plus  
27 lamivudine versus dolutegravir plus tenofovir disoproxil fumarate and emtricitabine in  
28 503 antiretroviral-naive adults with HIV-1 infection (GEMINI-1 and GEMINI-2): week 48 results from  
29 504 two multicentre, double-blind, randomised, non-inferiority, phase 3 trials. *Lancet*. 2019  
30 505 12;393(10167):143–55.  
31 506  
32  
33  
34  
35 507 15. van Wyk J, Ajana F, Bisshop F, De Wit S, Osiyemi O, Portilla Sogorb J, et al. Efficacy and  
36 Safety of Switching to Dolutegravir/Lamivudine Fixed-Dose 2-Drug Regimen vs Continuing a  
37 508 Tenofovir Alafenamide-Based 3- or 4-Drug Regimen for Maintenance of Virologic Suppression  
38 509 in Adults Living With Human Immunodeficiency Virus Type 1: Phase 3, Randomized,  
39 Noninferiority TANGO Study. *Clin Infect Dis*. 2020 Nov 5;71(8):1920–9.  
40 510  
41 511  
42  
43  
44 512 16. Llibre JM, Brites C, Cheng CY, Osiyemi O, Galera C, Hocqueloux L, et al. Efficacy and Safety  
45 of Switching to the 2-Drug Regimen Dolutegravir/Lamivudine Versus Continuing a 3- or 4-Drug  
46 513 Regimen for Maintaining Virologic Suppression in Adults Living With Human Immunodeficiency  
47 514 Virus 1 (HIV-1): Week 48 Results From the Phase 3, Noninferiority SALSA Randomized Trial.  
48 515 *Clin Infect Dis*. 2023 Feb 18;76(4):720–9.  
49 516  
50  
51  
52  
53 517 17. Osiyemi O, De Wit S, Ajana F, Bisshop F, Portilla J, Routy JP, et al. Efficacy and Safety of  
54 Switching to Dolutegravir/Lamivudine Versus Continuing a Tenofovir Alafenamide-Based 3- or  
55 518 4-Drug Regimen for Maintenance of Virologic Suppression in Adults Living With Human  
56 519  
57  
58  
59  
60

1  
2  
3  
4  
5  
6  
7  
8  
9  
10  
11  
12  
13  
14  
15  
16  
17  
18  
19  
20  
21  
22  
23  
24  
25  
26  
27  
28  
29  
30  
31  
32  
33  
34  
35  
36  
37  
38  
39  
40  
41  
42  
43  
44  
45  
46  
47  
48  
49  
50  
51  
52  
53  
54  
55  
56  
57  
58  
59  
60

Immunodeficiency Virus Type 1: Results Through Week 144 From the Phase 3, Noninferiority TANGO Randomized Trial. *Clin Infect Dis*. 2022 Sep 29;75(6):975–86.

18. Koethe JR, Jenkins CA, Lau B, Shepherd BE, Justice AC, Tate JP, et al. Rising Obesity Prevalence and Weight Gain Among Adults Starting Antiretroviral Therapy in the United States and Canada. *AIDS Res Hum Retroviruses*. 2016 Jan;32(1):50–8.

19. Bakal DR, Coelho LE, Luz PM, Clark JL, De Boni RB, Cardoso SW, et al. Obesity following ART initiation is common and influenced by both traditional and HIV-/ART-specific risk factors. *J Antimicrob Chemother*. 2018 01;73(8):2177–85.

20. Hill A, Waters L, Pozniak A. Are new antiretroviral treatments increasing the risks of clinical obesity? *J Virus Erad*. 5(1):41–3.

21. Sax PE, Erlandson KM, Lake JE, McComsey GA, Orkin C, Esser S, et al. Weight Gain Following Initiation of Antiretroviral Therapy: Risk Factors in Randomized Comparative Clinical Trials. *Clin Infect Dis*. 2019 Oct 14;

22. Dupont E, Yombi JC. Antiretroviral therapy and weight gain in antiretroviral treatment-experienced HIV patients: A review. *AIDS Rev*. 2023;25(1):54–64.

23. Thompson D, Edelsberg J, Colditz GA, Bird AP, Oster G. Lifetime health and economic consequences of obesity. *Arch Intern Med*. 1999 Oct 11;159(18):2177–83.

24. Consensus statements [Internet]. [cited 2019 Dec 6]. Available from: <https://www.idf.org/e-library/consensus-statements/60-idfconsensus-worldwide-definition-of-the-metabolic-syndrome.html>

25. HEARTS D: diagnosis and management of type 2 diabetes [Internet]. [cited 2022 Oct 14]. Available from: <https://www.who.int/publications-detail-redirect/who-ucn-ncd-20.1>

26. Wallace TM, Levy JC, Matthews DR. Use and abuse of HOMA modeling. *Diabetes Care*. 2004 Jun;27(6):1487–95.

27. 2018 Prevention Guidelines Tool CV Risk Calculator [Internet]. [cited 2023 Apr 4]. Available from: <http://static.heart.org/riskcalc/app/index.html#!/baseline-risk>

28. Framingham Heart Study [Internet]. [cited 2019 Dec 11]. Available from: <https://www.framinghamheartstudy.org/fhs-risk-functions/cardiovascular-disease-10-year-risk/>

1  
2  
3  
4  
5  
6  
7  
8  
9  
10  
11  
12  
13  
14  
15  
16  
17  
18  
19  
20  
21  
22  
23  
24  
25  
26  
27  
28  
29  
30  
31  
32  
33  
34  
35  
36  
37  
38  
39  
40  
41  
42  
43  
44  
45  
46  
47  
48  
49  
50  
51  
52  
53  
54  
55  
56  
57  
58  
59  
60

548 29. CHIP – Centre of Excellence for Health, Immunity and Infections [Internet]. [cited 2019 Dec  
549 17]. Available from: <https://chip.dk/Tools-Standards/Clinical-risk-scores>

For peer review only

1  
2  
3  
4  
5  
6  
7  
8  
9  
10  
11  
12  
13  
14  
15  
16  
17  
18  
19  
20  
21  
22  
23  
24  
25  
26  
27  
28  
29  
30  
31  
32  
33  
34  
35  
36  
37  
38  
39  
40  
41  
42  
43  
44  
45  
46  
47  
48  
49  
50  
51  
52  
53  
54  
55  
56  
57  
58  
59  
60

## 552 **FIGURE LEGENDS**

### 553 **Figure 1: Participants Timeline and Data Collection**

554 a) Eligible participants on abacavir/dolutegravir/lamivudine (ABC/DTG/3TC) for HIV infection for  
555 more than 6 months will be enrolled. Inclusion, randomization, and data collection will be performed  
556 at a baseline visit (Day 0) . Participants will be randomized to either continuation of a three-drug  
557 regimen with ABC/DTG/3TC (control) or a two-drug regimen with DTG/3TC (intervention). Data will  
558 be collected at follow up visits at week 4 (w4), week 24 (w24) and week 48 (w48). At study visits w1,  
559 w24, and w48 the following tests will be performed: Physical examination by clinician; blood tests  
560 including HIV-RNA and CD4 cell count; computed tomography scan (CT) of thorax and the upper  
561 abdomen, Dual-Energy x-ray absorptiometry (DXA) scan; 12-Item Short Form Survey (SF-12); liver  
562 elastography; External carotid artery ultrasound. Participants in the intervention arm will have plasma  
563 HIV RNA determined at week 4 for safety reasons. b) Participants enrolled in the cardiac MRI (CMRI)  
564 sub-study will additionally receive CMRI and 24-hours Holter ECG monitoring at visits w1 and w48.

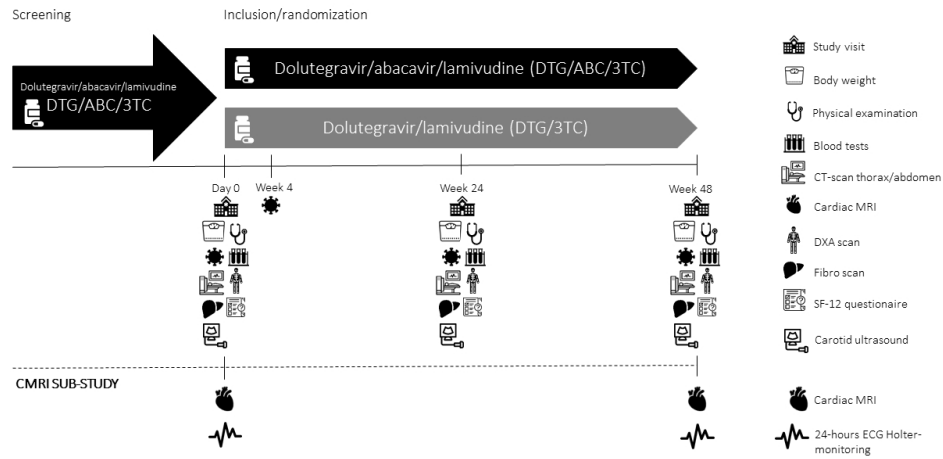

Figure 1: Participants Timeline and Data Collection

a) Eligible participants on abacavir/dolutedegravir/lamivudine (ABC/DTG/3TC) for HIV infection for more than 6 months will be enrolled. Inclusion, randomization, and data collection will be performed at a baseline visit (Day 0) . Participants will be randomized to either continuation of a three-drug regimen with ABC/DTG/3TC (control) or a two-drug regimen with DTG/3TC (intervention). Data will be collected at follow up visits at week 4 (w4), week 24 (w24) and week 48 (w48). At study visits w1, w24, and w48 the following tests will be performed: Physical examination by clinician; blood tests including HIV-RNA and CD4 cell count; computed tomography scan (CT) of thorax and the upper abdomen, Dual-Energy x-ray absorptiometry (DXA) scan; 12-Item Short Form Survey (SF-12); liver elastography; External carotid artery ultrasound. Participants in the intervention arm will have plasma HIV RNA determined at week 4 for safety reasons. b) Participants enrolled in the cardiac MRI (CMRI) sub-study will additionally receive CMRI and 24-hours Holter ECG monitoring at visits w1 and w48.

338x190mm (96 x 96 DPI)



1  
2  
3  
4  
5  
6  
7  
8  
9  
10  
11  
12  
13  
14  
15  
16  
17  
18  
19  
20  
21  
22  
23  
24  
25  
26  
27  
28  
29  
30  
31  
32  
33  
34  
35  
36  
37  
38  
39  
40  
41  
42  
43  
44  
45  
46  
47  
48  
49  
50  
51  
52  
53  
54  
55  
56  
57  
58  
59  
60

## SUPPLEMENTARY MATERIAL

### AVERTAS TRIAL

Changes in weight, body composition and metabolic parameters after switch to dolutegravir and lamivudine compared to continued treatment with dolutegravir, abacavir and lamivudine for virologically suppressed HIV infection:

A randomized open-label superiority trial - The AVERTAS trial

#### Registration

Protocol version: Awaiting amendment approval, protocol version 9.0 April 04, 2023

Ethics Committee of the Capital Region, Denmark (H-20011433)

Danish Medicines Agency (EudraCT no. 2019-004999-19)

Regional Data Protection Centre (P-2020-207)

clinicaltrials.gov (NCT04904406)

TABLE OF CONTENT

1  
2  
3  
4  
5  
6  
7  
8  
9  
10  
11  
12  
13  
14  
15  
16  
17  
18  
19  
20  
21  
22  
23  
24  
25  
26  
27  
28  
29  
30  
31  
32  
33  
34  
35  
36  
37  
38  
39  
40  
41  
42  
43  
44  
45  
46  
47  
48  
49  
50  
51  
52  
53  
54  
55  
56  
57  
58  
59  
60

**APPENDIX 1** ..... 3

**Radiological studies** ..... 3

**Computed Tomography (CT) scan** ..... 3

**Chest CT** ..... 3

**Coronary Artery Calcium Score (CACs)** ..... 3

**Unenhanced CT scan of the upper abdomen** ..... 3

**Visceral and subcutaneous adipose tissue scan** ..... 3

**Transient liver elastography (Fibro scan)** ..... 4

**Carotid Intima-Media Thickness (cIMT)** ..... 4

**Dual Energy X-ray Absorptiometry (DEXA)** ..... 4

**Cardiac Magnetic Resonance Imaging (Cardiac-MRI) SUB STUDY** ..... 5

**Holter Monitor ECG Recording (R-test)** ..... 5

**APPENDIX 2** ..... 6

**Informed Consent** ..... 6

**APPENDIX 3** ..... 7

**Biobank** ..... 7

**Project Specific Biobank** ..... 7

**Biobank for Future Research** ..... 7

**REFERENCES** ..... 8

## APPENDIX 1

### Radiological studies

#### Computed Tomography (CT) scan

All CT imaging will be performed using a 320-multidetector scanner (Toshiba Medical Systems, Otawara-shi, Tochigi-ken, Japan). CT scans will encompass a low-dose chest CT, an unenhanced coronary artery calcium score (CACs), and an unenhanced scan of the upper abdomen to determine liver steatosis and an abdominal single slice acquisition for measurements of visceral adipose tissue (VAT), and subcutaneous adipose tissue (SAT). No contrast will be used in the scan protocol. The CT scans will be optional. All CT-analyses will be conducted by trained physicians blinded to randomization, clinical and biochemical details of the study participants.

#### Chest CT

The chest examination will use a low-dose protocol with images captured at full inspiration using automatic exposure control at 120 kV with an SD of 15. AIDR will be used for image reconstruction with both 1/1 mm and 3/3 mm slices. A lung kernel (FC52) will be used for thin-slice dataset reconstruction to evaluate lung parenchyma and airways, while a soft tissue kernel will be used for thicker slices to evaluate mediastinum and pleurae. A soft tissue kernel (FC08) and filtered back projection will be used to reconstruct an additional dataset with 1/1 mm slices for quantitative emphysema measurements using a dedicated lung density program (Vitrea Vital Images, Minnetonka, MN, U.S.).

#### Coronary Artery Calcium Score (CACs)

120kV (BMI < 28) or 135 kV (BMI > 28), automatic exposure control with an SD 55 (min 30 mA and max 300 mA). ECG-triggering with exposure at 75% of the RR-interval will be used, and reconstructions will be performed with a soft tissue kernel (FC12) and 3/3 mm slice thickness/increment.

#### Unenhanced CT scan of the upper abdomen

A single 16 cm volume scan extending from the left hemidiaphragm and downwards using 40 mA (fixed) and 120 kV. reconstructions will be performed with 1/1 mm and a soft tissue kernel (FC12) using an iterative reconstruction technique (Adaptive Iterative Dose Reduction, AIDR).

Liver attenuation will be measured using Vitrea 3.1 imaging software (Vital Images Inc., Minnetonka, MN, USA). Two regions of interest (ROI) with an area of 1500 mm<sup>2</sup> (+/- 100 mm<sup>2</sup>) will be placed in Coinaud liver segments 5 and 6, and the average liver attenuation calculated in Hounsfield Units (HU). Moderate-to-severe hepatic steatosis will be defined as CT liver attenuation <48 HU with a specificity of 100%, sensitivity of 53.8%, positive predictive value of 100%, and negative predictive value of 93.9%.

#### Visceral and subcutaneous adipose tissue scan

A single 8 mm slice at the level of lumbar vertebra 4 (L4) will be performed using 120kV and 210 mA. Reconstructions will be performed with filtered back projection (FBP) and soft tissue kernel (FC08). Trained

1  
2  
3  
4 personnel will use commercially available CT software (Fat Measurement, Aquilion ONE; Canon, Japan) to  
5 measure the cross-sectional area of adipose tissue defined as voxels with attenuation values in the range of –  
6 150 to – 70 Hounsfield units. From within a manually adjusted region of interest delineated by the muscular  
7 compartments, VAT area will be calculated automatically. SAT will be defined as adipose tissue superficial to  
8 the abdominal and paraspinal muscles. Intraintestinal and intramuscular adipose tissues will be manually  
9 excluded. Mean density for VAT and SAT, respectively, will be calculated and reported, using four regions of  
10 interest within each fat depot.  
11

### 16 **Transient liver elastography (Fibro scan)**

17 Transient elastography will be performed by trained personnel using Fibro scan (Echosens™, Paris, France)  
18 to assess liver stiffness and quantify liver fat. With the fasting participant in supine position, the transducer  
19 will be placed on the skin in an intercostal space in the right midaxillary line at the level of the right liver lobe.  
20 The liver stiffness and controlled attenuation parameter (CAP) is measured using a M- or XL probe. Liver  
21 stiffness will be expressed in kilopascal (kPa) and CAP in dB/m. The physiologic stiffness of the liver parenchyma  
22 is  $5.5 \pm 1.6$  kPa by transient elastography (1). Liver stiffness is positively correlated with liver fibrosis, yielding  
23 higher LSM with higher amounts of liver fibrosis. In this study we define significant liver fibrosis as  $LSM \geq 7.6$   
24 kPa (2). CAP quantifies liver fat by applying a proprietary algorithm to evaluate the decrease in amplitude of  
25 ultrasound waves propagating through the (3). The cut-off for fatty liver will be set at 285 dB/m. Patients must  
26 be fasting for a minimum of two hours prior to the procedure.  
27  
28  
29  
30  
31  
32  
33

### 35 **Carotid Intima-Media Thickness (cIMT)**

36 External carotid artery ultrasound will be performed to determine intimal thickness as a measure of  
37 arteriosclerosis. cIMT will be measured bilaterally at the far wall of the distal common carotid artery caudally  
38 of the sinus caroticus covering 10 mm using a Sonosite M-Turbo (Sonosite Inc., Bothell, WA, USA) with a 13.6  
39 MHz linear transducer and automated software (SonoCalc IMT 5.0; Sonosite Inc.). The measurement will be  
40 performed in one projection in a longitudinal view with both the near and far wall visible. An increased cIMT  
41 will be defined as an average thickness of  $> 900 \mu\text{m}$ . Average measurements  $> 900 \mu\text{m}$  or visible plaques will  
42 result in referral to the Department of Clinical Physiology for further evaluation (4).  
43  
44  
45  
46  
47

### 48 **Dual Energy X-ray Absorptiometry (DEXA)**

49 To estimate the amount of fat in the trunk and the extremities whole-body DEXA scanning [Hologic QDR-2000  
50 W (Bedford, MA, USA) in single beam mode; in vivo coefficient of variation (CV) 1.6 for total and 3.2 for regional  
51 fat mass (10 duplicate measurements)] will be performed. The trunk will be defined as the region including  
52 the chest, abdomen, and pelvis. The upper limit of the leg region will be placed through the hip joints at an  
53 angle of approximately  $45^\circ$ , and the upper limit of the arm region will be placed vertically through the shoulder  
54 joints. Peripheral or limb fat mass will be defined as the sum of arm and leg fat masses. The percentage of limb  
55  
56  
57  
58  
59  
60

1  
2  
3  
4  
5  
6  
7  
8  
9  
10  
11  
12  
13  
14  
15  
16  
17  
18  
19  
20  
21  
22  
23  
24  
25  
26  
27  
28  
29  
30  
31  
32  
33  
34  
35  
36  
37  
38  
39  
40  
41  
42  
43  
44  
45  
46  
47  
48  
49  
50  
51  
52  
53  
54  
55  
56  
57  
58  
59  
60

fat will be calculated as (limb fat mass/ total fat mass) x 100% (5). Patient's weight will be estimated by DEXA.

Patients must be fasting for 6 hours prior to scanning. DEXA will be performed at baseline, week 24 and 48.

### **Cardiac Magnetic Resonance Imaging (Cardiac-MRI) SUB STUDY**

The cardiac MRI protocol includes functional and structural MRI measurements and will be optional. MRI scans will be performed at a MAGNETOM Prisma 3 Tesla scan, SIEMENS Healthineers (Erlangen Germany) at Hvidovre hospital. A SSFP MRI imaging sequence will be applied to determine the volume and function of the atria and ventricles using a 2D cine imaging protocol. Biventricular and bi-atrial function are evaluated from trans axial (7mm, no gap, temporal resolution 25-45 msec) and from short axis slices (double oblique) which also entails the atria. In addition, 2,3, and 4 chamber sequences are obtained of the left ventricle. The blood flow will be determined in the pulmonary artery and aorta and the flow velocity and compliance of aorta will be evaluated using phase contrast flow sequences. Structural myocardial MRI will involve T1 measurements using a Modified Look-Locker Imaging (MOLLI) sequence performed during one breath-hold per slice (6). Patients with an eGFR larger than 45 ml/min will subsequently undergo additional T1 mapping after intravenous injection of gadolinium contrast (gadobutrol (gadovist) in low concentration (0.1 mmol/kg) to detect local and diffuse myocardial fibrosis. The MR images are subsequently transferred to a dedicated workstation where the imaging analysis will be performed.

To calculate extracellular volume (ECV) erythrocyte volume will be needed. This plasma analysis is already performed in the main study.

### **Holter Monitor ECG Recording (R-test)**

Heart rhythm will be monitored by Holter monitor ECG recording (R-test) for 24 hours. A Cortrium C3+ Holter Monitor will be applied at to the chest with three pads. The 24-hour ECG data will be read and analyzed in a dedicated software system. Any event of arrhythmia will be registered during the R-test and evaluated.

1  
2  
3  
4 **APPENDIX 2**

5  
6 **Informed Consent**

7  
8  
9  
10  
11 **Informed consent form for participation in a health research project.**

12  
13 Does Switching from 3-drug to 2-drug Therapy in People Living with HIV  
14 affect weight, metabolism and the heart? – The AVERTAS-1 Trial.

15  
16 AVERTAS-1, H-20011433; EUDRA-CT NO.: 2019-004999-19, Protocol v. 9.0

17  
18 Translation of the Danish Informed consent Form.

19  
20  
21 **Participant's statement:**

22 I have received written and oral information about the study, and I am sufficiently informed about the  
23 aim, methods, risks and benefits to agree to participate.

24  
25  
26 I know that participation is voluntary, and that I can withdraw my consent at any time without losing my  
27 current or future rights to treatment.

28  
29  
30 I give consent to participate in the research project and to the withdrawal and storage of my biological  
31 material in a research biobank. I have gotten a copy of this consent form and a copy of the participant  
32 information for own use.

33  
34  
35  
36 Name of the participant: \_\_\_\_\_

37  
38 Date: \_\_\_\_\_ Signature: \_\_\_\_\_

39  
40  
41 If any new essential health information about you should appear during the study, you will be informed.

42 **If you do not want** this essential health information, you should mark here: \_\_\_\_\_ (tick x)

43  
44  
45 Do you wish to receive information on the finale results of the study as well as any possible personal  
46 consequence? Yes \_\_\_\_\_ (tick) No \_\_\_\_\_ (tick x)

47  
48  
49 **Statement from the informant:**

50 I declare that the participant has received oral and written information about the research project.

51 In my belief sufficient information is provided for the subject to make the decision about participating in  
52 the study.

53  
54  
55  
56 Name of the informant: \_\_\_\_\_

57  
58  
59 Date: \_\_\_\_\_ Signature: \_\_\_\_\_

1  
2  
3  
4  
5  
6  
7  
8  
9  
10  
11  
12  
13  
14  
15  
16  
17  
18  
19  
20  
21  
22  
23  
24  
25  
26  
27  
28  
29  
30  
31  
32  
33  
34  
35  
36  
37  
38  
39  
40  
41  
42  
43  
44  
45  
46  
47  
48  
49  
50  
51  
52  
53  
54  
55  
56  
57  
58  
59  
60

## APPENDIX 3

### Biobank

#### Project Specific Biobank

At day 0, 24 and 48 3 ml will be collected for the purpose of detecting plasma interleukin 1 $\beta$  and 6, soluble P-selectin, soluble glycoprotein VI, vascular cell adhesion molecule 1, intercellular adhesion molecule 1. A project-specific research biobank will be established for freezer storage in a -80 °C freezer located at the Copenhagen University Hospital – Amager and Hvidovre. Plasma will be stored pseudo anonymized marked with study-IDs. The identification key will be kept separately. The project specific biobank will be terminated immediately after collection of the last patients' blood samples. Samples will be analyzed collectively. Any excess blood will be stored in a biobank for future research.

#### Biobank for Future Research

A biobank for future research will be established. Besides excess blood material from the project specific biobank, additional blood samples are drawn (3 ml) at visit 1, 24 and 48 and stored in a -80 °C freezer. Patients must give separate written consent to allow storage of their biological material for future research outside this study. Permission on biobank for future research will be applied from The Danish Data Protection Agency. The biological material will be handled and stored according to the agency's guidelines.

## REFERENCES

1. Roulot D, Czernichow S, Le Clésiau H, Costes JL, Vergnaud AC, Beaugrand M. Liver stiffness values in apparently healthy subjects: influence of gender and metabolic syndrome. *J Hepatol*. april 2008;48(4):606–13.
2. Hsu C, Caussy C, Imajo K, Chen J, Singh S, Kaulback K, m.fl. Magnetic Resonance vs Transient Elastography Analysis of Patients With Nonalcoholic Fatty Liver Disease: A Systematic Review and Pooled Analysis of Individual Participants. *Clin Gastroenterol Hepatol Off Clin Pract J Am Gastroenterol Assoc*. marts 2019;17(4):630-637.e8.
3. Sasso M, Audière S, Kemgang A, Gaouar F, Corpechot C, Chazouillères O, m.fl. Liver Steatosis Assessed by Controlled Attenuation Parameter (CAP) Measured with the XL Probe of the FibroScan: A Pilot Study Assessing Diagnostic Accuracy. *Ultrasound Med Biol*. januar 2016;42(1):92–103.
4. Knudsen A, Malmberg CAE, Kjær A, Lebech AM. Low prevalence of peripheral arterial disease in a cross-sectional study of Danish HIV-infected patients. *Infect Dis Lond Engl*. 2015;47(11):776–82.
5. Hansen BR, Haugaard SB, Jensen FK, Jensen JEB, Andresen L, Iversen J, m.fl. Long-term high-physiological-dose growth hormone reduces intra-abdominal fat in HIV-infected patients with a neutral effect on glucose metabolism. *HIV Med*. april 2010;11(4):266–75.
6. Taylor AJ, Salerno M, Dharmakumar R, Jerosch-Herold M. T1 Mapping: Basic Techniques and Clinical Applications. *JACC Cardiovasc Imaging*. januar 2016;9(1):67–81.



# Reporting checklist for protocol of a clinical trial.

Based on the SPIRIT guidelines.

## Instructions to authors

Complete this checklist by entering the page numbers from your manuscript where readers will find each of the items listed below.

Your article may not currently address all the items on the checklist. Please modify your text to include the missing information. If you are certain that an item does not apply, please write "n/a" and provide a short explanation.

Upload your completed checklist as an extra file when you submit to a journal.

In your methods section, say that you used the SPIRIT reporting guidelines, and cite them as:

Chan A-W, Tetzlaff JM, Gøtzsche PC, Altman DG, Mann H, Berlin J, Dickersin K, Hróbjartsson A, Schulz KF, Parulekar WR, Krleža-Jerić K, Laupacis A, Moher D. SPIRIT 2013 Explanation and Elaboration: Guidance for protocols of clinical trials. *BMJ*. 2013;346:e7586

|                                             |                     | Reporting Item                                                                                               | Page Number |
|---------------------------------------------|---------------------|--------------------------------------------------------------------------------------------------------------|-------------|
| <b>Administrative information</b>           |                     |                                                                                                              |             |
| Title                                       | <a href="#">#1</a>  | Descriptive title identifying the study design, population, interventions, and, if applicable, trial acronym | 1           |
| Trial registration                          | <a href="#">#2a</a> | Trial identifier and registry name. If not yet registered, name of intended registry                         | 1           |
| Trial registration: data set                | <a href="#">#2b</a> | All items from the World Health Organization Trial Registration Data Set                                     | NA          |
| Protocol version                            | <a href="#">#3</a>  | Date and version identifier                                                                                  | 1           |
| Funding                                     | <a href="#">#4</a>  | Sources and types of financial, material, and other support                                                  | 17          |
| Roles and responsibilities: contributorship | <a href="#">#5a</a> | Names, affiliations, and roles of protocol contributors                                                      | 16, 17      |

|    |                           |                     |                                                        |     |
|----|---------------------------|---------------------|--------------------------------------------------------|-----|
| 1  | Roles and                 | <a href="#">#5b</a> | Name and contact information for the trial sponsor     | 2   |
| 2  | responsibilities:         |                     |                                                        |     |
| 3  | sponsor contact           |                     |                                                        |     |
| 4  | information               |                     |                                                        |     |
| 5  |                           |                     |                                                        |     |
| 6  |                           |                     |                                                        |     |
| 7  |                           |                     |                                                        |     |
| 8  | Roles and                 | <a href="#">#5c</a> | Role of study sponsor and funders, if any, in study    | 2   |
| 9  | responsibilities:         |                     | design; collection, management, analysis, and          |     |
| 10 | sponsor and funder        |                     | interpretation of data; writing of the report; and the |     |
| 11 |                           |                     | decision to submit the report for publication,         |     |
| 12 |                           |                     | including whether they will have ultimate authority    |     |
| 13 |                           |                     | over any of these activities                           |     |
| 14 |                           |                     |                                                        |     |
| 15 |                           |                     |                                                        |     |
| 16 |                           |                     |                                                        |     |
| 17 | Roles and                 | <a href="#">#5d</a> | Composition, roles, and responsibilities of the        | 1   |
| 18 | responsibilities:         |                     | coordinating centre, steering committee, endpoint      |     |
| 19 | committees                |                     | adjudication committee, data management team,          |     |
| 20 |                           |                     | and other individuals or groups overseeing the         |     |
| 21 |                           |                     | trial, if applicable (see Item 21a for data            |     |
| 22 |                           |                     | monitoring committee)                                  |     |
| 23 |                           |                     |                                                        |     |
| 24 |                           |                     |                                                        |     |
| 25 |                           |                     |                                                        |     |
| 26 |                           |                     |                                                        |     |
| 27 | <b>Introduction</b>       |                     |                                                        |     |
| 28 |                           |                     |                                                        |     |
| 29 |                           |                     |                                                        |     |
| 30 | Background and            | <a href="#">#6a</a> | Description of research question and justification     | 3-4 |
| 31 | rationale                 |                     | for undertaking the trial, including summary of        |     |
| 32 |                           |                     | relevant studies (published and unpublished)           |     |
| 33 |                           |                     | examining benefits and harms for each                  |     |
| 34 |                           |                     | intervention                                           |     |
| 35 |                           |                     |                                                        |     |
| 36 |                           |                     |                                                        |     |
| 37 |                           |                     |                                                        |     |
| 38 | Background and            | <a href="#">#6b</a> | Explanation for choice of comparators                  | 4   |
| 39 | rationale: choice of      |                     |                                                        |     |
| 40 | comparators               |                     |                                                        |     |
| 41 |                           |                     |                                                        |     |
| 42 |                           |                     |                                                        |     |
| 43 | Objectives                | <a href="#">#7</a>  | Specific objectives or hypotheses                      | 4   |
| 44 |                           |                     |                                                        |     |
| 45 |                           |                     |                                                        |     |
| 46 | Trial design              | <a href="#">#8</a>  | Description of trial design including type of trial    | 4   |
| 47 |                           |                     | (eg, parallel group, crossover, factorial, single      |     |
| 48 |                           |                     | group), allocation ratio, and framework (eg,           |     |
| 49 |                           |                     | superiority, equivalence, non-inferiority,             |     |
| 50 |                           |                     | exploratory)                                           |     |
| 51 |                           |                     |                                                        |     |
| 52 |                           |                     |                                                        |     |
| 53 |                           |                     |                                                        |     |
| 54 | <b>Methods:</b>           |                     |                                                        |     |
| 55 | <b>Participants,</b>      |                     |                                                        |     |
| 56 | <b>interventions, and</b> |                     |                                                        |     |
| 57 | <b>outcomes</b>           |                     |                                                        |     |
| 58 |                           |                     |                                                        |     |
| 59 |                           |                     |                                                        |     |
| 60 |                           |                     |                                                        |     |

|    |                      |                      |                                                                                                                                                                                                                                                                                                                                                                                |          |
|----|----------------------|----------------------|--------------------------------------------------------------------------------------------------------------------------------------------------------------------------------------------------------------------------------------------------------------------------------------------------------------------------------------------------------------------------------|----------|
| 1  | Study setting        | <a href="#">#9</a>   | Description of study settings (eg, community clinic, academic hospital) and list of countries where data will be collected. Reference to where list of study sites can be obtained                                                                                                                                                                                             | 5        |
| 2  |                      |                      |                                                                                                                                                                                                                                                                                                                                                                                |          |
| 3  |                      |                      |                                                                                                                                                                                                                                                                                                                                                                                |          |
| 4  |                      |                      |                                                                                                                                                                                                                                                                                                                                                                                |          |
| 5  |                      |                      |                                                                                                                                                                                                                                                                                                                                                                                |          |
| 6  |                      |                      |                                                                                                                                                                                                                                                                                                                                                                                |          |
| 7  |                      |                      |                                                                                                                                                                                                                                                                                                                                                                                |          |
| 8  | Eligibility criteria | <a href="#">#10</a>  | Inclusion and exclusion criteria for participants. If applicable, eligibility criteria for study centres and individuals who will perform the interventions (eg, surgeons, psychotherapists)                                                                                                                                                                                   | 5        |
| 9  |                      |                      |                                                                                                                                                                                                                                                                                                                                                                                |          |
| 10 |                      |                      |                                                                                                                                                                                                                                                                                                                                                                                |          |
| 11 |                      |                      |                                                                                                                                                                                                                                                                                                                                                                                |          |
| 12 |                      |                      |                                                                                                                                                                                                                                                                                                                                                                                |          |
| 13 |                      |                      |                                                                                                                                                                                                                                                                                                                                                                                |          |
| 14 | Interventions:       | <a href="#">#11a</a> | Interventions for each group with sufficient detail to allow replication, including how and when they will be administered                                                                                                                                                                                                                                                     | 5        |
| 15 | description          |                      |                                                                                                                                                                                                                                                                                                                                                                                |          |
| 16 |                      |                      |                                                                                                                                                                                                                                                                                                                                                                                |          |
| 17 |                      |                      |                                                                                                                                                                                                                                                                                                                                                                                |          |
| 18 |                      |                      |                                                                                                                                                                                                                                                                                                                                                                                |          |
| 19 |                      |                      |                                                                                                                                                                                                                                                                                                                                                                                |          |
| 20 | Interventions:       | <a href="#">#11b</a> | Criteria for discontinuing or modifying allocated interventions for a given trial participant (eg, drug dose change in response to harms, participant request, or improving / worsening disease)                                                                                                                                                                               | 6        |
| 21 | modifications        |                      |                                                                                                                                                                                                                                                                                                                                                                                |          |
| 22 |                      |                      |                                                                                                                                                                                                                                                                                                                                                                                |          |
| 23 |                      |                      |                                                                                                                                                                                                                                                                                                                                                                                |          |
| 24 |                      |                      |                                                                                                                                                                                                                                                                                                                                                                                |          |
| 25 |                      |                      |                                                                                                                                                                                                                                                                                                                                                                                |          |
| 26 |                      |                      |                                                                                                                                                                                                                                                                                                                                                                                |          |
| 27 | Interventions:       | <a href="#">#11c</a> | Strategies to improve adherence to intervention protocols, and any procedures for monitoring adherence (eg, drug tablet return; laboratory tests)                                                                                                                                                                                                                              | 6        |
| 28 | adherence            |                      |                                                                                                                                                                                                                                                                                                                                                                                |          |
| 29 |                      |                      |                                                                                                                                                                                                                                                                                                                                                                                |          |
| 30 |                      |                      |                                                                                                                                                                                                                                                                                                                                                                                |          |
| 31 |                      |                      |                                                                                                                                                                                                                                                                                                                                                                                |          |
| 32 |                      |                      |                                                                                                                                                                                                                                                                                                                                                                                |          |
| 33 |                      |                      |                                                                                                                                                                                                                                                                                                                                                                                |          |
| 34 | Interventions:       | <a href="#">#11d</a> | Relevant concomitant care and interventions that are permitted or prohibited during the trial                                                                                                                                                                                                                                                                                  | 6        |
| 35 | concomitant care     |                      |                                                                                                                                                                                                                                                                                                                                                                                |          |
| 36 |                      |                      |                                                                                                                                                                                                                                                                                                                                                                                |          |
| 37 |                      |                      |                                                                                                                                                                                                                                                                                                                                                                                |          |
| 38 | Outcomes             | <a href="#">#12</a>  | Primary, secondary, and other outcomes, including the specific measurement variable (eg, systolic blood pressure), analysis metric (eg, change from baseline, final value, time to event), method of aggregation (eg, median, proportion), and time point for each outcome. Explanation of the clinical relevance of chosen efficacy and harm outcomes is strongly recommended | 6-8      |
| 39 |                      |                      |                                                                                                                                                                                                                                                                                                                                                                                |          |
| 40 |                      |                      |                                                                                                                                                                                                                                                                                                                                                                                |          |
| 41 |                      |                      |                                                                                                                                                                                                                                                                                                                                                                                |          |
| 42 |                      |                      |                                                                                                                                                                                                                                                                                                                                                                                |          |
| 43 |                      |                      |                                                                                                                                                                                                                                                                                                                                                                                |          |
| 44 |                      |                      |                                                                                                                                                                                                                                                                                                                                                                                |          |
| 45 |                      |                      |                                                                                                                                                                                                                                                                                                                                                                                |          |
| 46 |                      |                      |                                                                                                                                                                                                                                                                                                                                                                                |          |
| 47 |                      |                      |                                                                                                                                                                                                                                                                                                                                                                                |          |
| 48 |                      |                      |                                                                                                                                                                                                                                                                                                                                                                                |          |
| 49 |                      |                      |                                                                                                                                                                                                                                                                                                                                                                                |          |
| 50 | Participant timeline | <a href="#">#13</a>  | Time schedule of enrolment, interventions (including any run-ins and washouts), assessments, and visits for participants. A schematic diagram is highly recommended (see Figure)                                                                                                                                                                                               | Figure 1 |
| 51 |                      |                      |                                                                                                                                                                                                                                                                                                                                                                                |          |
| 52 |                      |                      |                                                                                                                                                                                                                                                                                                                                                                                |          |
| 53 |                      |                      |                                                                                                                                                                                                                                                                                                                                                                                |          |
| 54 |                      |                      |                                                                                                                                                                                                                                                                                                                                                                                |          |
| 55 |                      |                      |                                                                                                                                                                                                                                                                                                                                                                                |          |
| 56 |                      |                      |                                                                                                                                                                                                                                                                                                                                                                                |          |
| 57 |                      |                      |                                                                                                                                                                                                                                                                                                                                                                                |          |
| 58 |                      |                      |                                                                                                                                                                                                                                                                                                                                                                                |          |
| 59 |                      |                      |                                                                                                                                                                                                                                                                                                                                                                                |          |
| 60 |                      |                      |                                                                                                                                                                                                                                                                                                                                                                                |          |

|    |                           |                      |                                                        |     |
|----|---------------------------|----------------------|--------------------------------------------------------|-----|
| 1  | Sample size               | <a href="#">#14</a>  | Estimated number of participants needed to             | 8-9 |
| 2  |                           |                      | achieve study objectives and how it was                |     |
| 3  |                           |                      | determined, including clinical and statistical         |     |
| 4  |                           |                      | assumptions supporting any sample size                 |     |
| 5  |                           |                      | calculations                                           |     |
| 6  |                           |                      |                                                        |     |
| 7  |                           |                      |                                                        |     |
| 8  |                           |                      |                                                        |     |
| 9  | Recruitment               | <a href="#">#15</a>  | Strategies for achieving adequate participant          | 9   |
| 10 |                           |                      | enrolment to reach target sample size                  |     |
| 11 |                           |                      |                                                        |     |
| 12 |                           |                      |                                                        |     |
| 13 | <b>Methods:</b>           |                      |                                                        |     |
| 14 | <b>Assignment of</b>      |                      |                                                        |     |
| 15 | <b>interventions (for</b> |                      |                                                        |     |
| 16 | <b>controlled trials)</b> |                      |                                                        |     |
| 17 |                           |                      |                                                        |     |
| 18 |                           |                      |                                                        |     |
| 19 |                           |                      |                                                        |     |
| 20 | Allocation: sequence      | <a href="#">#16a</a> | Method of generating the allocation sequence (eg,      | 9   |
| 21 | generation                |                      | computer-generated random numbers), and list of        |     |
| 22 |                           |                      | any factors for stratification. To reduce              |     |
| 23 |                           |                      | predictability of a random sequence, details of any    |     |
| 24 |                           |                      | planned restriction (eg, blocking) should be           |     |
| 25 |                           |                      | provided in a separate document that is                |     |
| 26 |                           |                      | unavailable to those who enrol participants or         |     |
| 27 |                           |                      | assign interventions                                   |     |
| 28 |                           |                      |                                                        |     |
| 29 |                           |                      |                                                        |     |
| 30 |                           |                      |                                                        |     |
| 31 |                           |                      |                                                        |     |
| 32 |                           |                      |                                                        |     |
| 33 | Allocation                | <a href="#">#16b</a> | Mechanism of implementing the allocation               | 9   |
| 34 | concealment               |                      | sequence (eg, central telephone; sequentially          |     |
| 35 | mechanism                 |                      | numbered, opaque, sealed envelopes), describing        |     |
| 36 |                           |                      | any steps to conceal the sequence until                |     |
| 37 |                           |                      | interventions are assigned                             |     |
| 38 |                           |                      |                                                        |     |
| 39 |                           |                      |                                                        |     |
| 40 |                           |                      |                                                        |     |
| 41 | Allocation:               | <a href="#">#16c</a> | Who will generate the allocation sequence, who         | 9   |
| 42 | implementation            |                      | will enrol participants, and who will assign           |     |
| 43 |                           |                      | participants to interventions                          |     |
| 44 |                           |                      |                                                        |     |
| 45 |                           |                      |                                                        |     |
| 46 | Blinding (masking)        | <a href="#">#17a</a> | Who will be blinded after assignment to                | 9   |
| 47 |                           |                      | interventions (eg, trial participants, care providers, |     |
| 48 |                           |                      | outcome assessors, data analysts), and how             |     |
| 49 |                           |                      |                                                        |     |
| 50 |                           |                      |                                                        |     |
| 51 |                           |                      |                                                        |     |
| 52 | Blinding (masking):       | <a href="#">#17b</a> | If blinded, circumstances under which unblinding       | NA  |
| 53 | emergency                 |                      | is permissible, and procedure for revealing a          |     |
| 54 | unblinding                |                      | participant's allocated intervention during the trial  |     |
| 55 |                           |                      |                                                        |     |
| 56 |                           |                      |                                                        |     |
| 57 | <b>Methods: Data</b>      |                      |                                                        |     |
| 58 | <b>collection,</b>        |                      |                                                        |     |
| 59 |                           |                      |                                                        |     |
| 60 |                           |                      |                                                        |     |

1 **management, and**  
2 **analysis**

|    |                        |                      |                                                         |
|----|------------------------|----------------------|---------------------------------------------------------|
| 3  |                        |                      |                                                         |
| 4  | Data collection plan   | <a href="#">#18a</a> | Plans for assessment and collection of outcome, 9       |
| 5  |                        |                      | baseline, and other trial data, including any           |
| 6  |                        |                      | related processes to promote data quality (eg,          |
| 7  |                        |                      | duplicate measurements, training of assessors)          |
| 8  |                        |                      | and a description of study instruments (eg,             |
| 9  |                        |                      | questionnaires, laboratory tests) along with their      |
| 10 |                        |                      | reliability and validity, if known. Reference to        |
| 11 |                        |                      | where data collection forms can be found, if not in     |
| 12 |                        |                      | the protocol                                            |
| 13 |                        |                      |                                                         |
| 14 | Data collection plan:  | <a href="#">#18b</a> | Plans to promote participant retention and 6            |
| 15 | retention              |                      | complete follow-up, including list of any outcome       |
| 16 |                        |                      | data to be collected for participants who               |
| 17 |                        |                      | discontinue or deviate from intervention protocols      |
| 18 |                        |                      |                                                         |
| 19 | Data management        | <a href="#">#19</a>  | Plans for data entry, coding, security, and storage, 13 |
| 20 |                        |                      | including any related processes to promote data         |
| 21 |                        |                      | quality (eg, double data entry; range checks for        |
| 22 |                        |                      | data values). Reference to where details of data        |
| 23 |                        |                      | management procedures can be found, if not in           |
| 24 |                        |                      | the protocol                                            |
| 25 |                        |                      |                                                         |
| 26 | Statistics: outcomes   | <a href="#">#20a</a> | Statistical methods for analysing primary and 13-14     |
| 27 |                        |                      | secondary outcomes. Reference to where other            |
| 28 |                        |                      | details of the statistical analysis plan can be         |
| 29 |                        |                      | found, if not in the protocol                           |
| 30 |                        |                      |                                                         |
| 31 | Statistics: additional | <a href="#">#20b</a> | Methods for any additional analyses (eg, NA             |
| 32 | analyses               |                      | subgroup and adjusted analyses)                         |
| 33 |                        |                      |                                                         |
| 34 | Statistics: analysis   | <a href="#">#20c</a> | Definition of analysis population relating to 14        |
| 35 | population and         |                      | protocol non-adherence (eg, as randomised               |
| 36 | missing data           |                      | analysis), and any statistical methods to handle        |
| 37 |                        |                      | missing data (eg, multiple imputation)                  |
| 38 |                        |                      |                                                         |
| 39 |                        |                      |                                                         |
| 40 |                        |                      |                                                         |
| 41 |                        |                      |                                                         |
| 42 | <b>Methods:</b>        |                      |                                                         |
| 43 | <b>Monitoring</b>      |                      |                                                         |
| 44 |                        |                      |                                                         |
| 45 | Data monitoring:       | <a href="#">#21a</a> | Composition of data monitoring committee (DMC); 14      |
| 46 | formal committee       |                      | summary of its role and reporting structure;            |
| 47 |                        |                      |                                                         |
| 48 |                        |                      |                                                         |
| 49 |                        |                      |                                                         |
| 50 |                        |                      |                                                         |
| 51 |                        |                      |                                                         |
| 52 |                        |                      |                                                         |
| 53 |                        |                      |                                                         |
| 54 |                        |                      |                                                         |
| 55 |                        |                      |                                                         |
| 56 |                        |                      |                                                         |
| 57 |                        |                      |                                                         |
| 58 |                        |                      |                                                         |
| 59 |                        |                      |                                                         |
| 60 |                        |                      |                                                         |

statement of whether it is independent from the sponsor and competing interests; and reference to where further details about its charter can be found, if not in the protocol. Alternatively, an explanation of why a DMC is not needed

|    |                      |                      |                                                      |
|----|----------------------|----------------------|------------------------------------------------------|
| 1  |                      |                      |                                                      |
| 2  |                      |                      |                                                      |
| 3  |                      |                      |                                                      |
| 4  |                      |                      |                                                      |
| 5  |                      |                      |                                                      |
| 6  |                      |                      |                                                      |
| 7  |                      |                      |                                                      |
| 8  |                      |                      |                                                      |
| 9  | Data monitoring:     | <a href="#">#21b</a> | Description of any interim analyses and stopping     |
| 10 | interim analysis     |                      | guidelines, including who will have access to        |
| 11 |                      |                      | these interim results and make the final decision    |
| 12 |                      |                      | to terminate the trial                               |
| 13 |                      |                      |                                                      |
| 14 |                      |                      |                                                      |
| 15 | Harms                | <a href="#">#22</a>  | Plans for collecting, assessing, reporting, and      |
| 16 |                      |                      | managing solicited and spontaneously reported        |
| 17 |                      |                      | adverse events and other unintended effects of       |
| 18 |                      |                      | trial interventions or trial conduct                 |
| 19 |                      |                      |                                                      |
| 20 |                      |                      |                                                      |
| 21 |                      |                      |                                                      |
| 22 | Auditing             | <a href="#">#23</a>  | Frequency and procedures for auditing trial          |
| 23 |                      |                      | conduct, if any, and whether the process will be     |
| 24 |                      |                      | independent from investigators and the sponsor       |
| 25 |                      |                      |                                                      |
| 26 |                      |                      |                                                      |
| 27 | <b>Ethics and</b>    |                      |                                                      |
| 28 | <b>dissemination</b> |                      |                                                      |
| 29 |                      |                      |                                                      |
| 30 |                      |                      |                                                      |
| 31 | Research ethics      | <a href="#">#24</a>  | Plans for seeking research ethics committee /        |
| 32 | approval             |                      | institutional review board (REC / IRB) approval      |
| 33 |                      |                      |                                                      |
| 34 |                      |                      |                                                      |
| 35 | Protocol             | <a href="#">#25</a>  | Plans for communicating important protocol           |
| 36 | amendments           |                      | modifications (eg, changes to eligibility criteria,  |
| 37 |                      |                      | outcomes, analyses) to relevant parties (eg,         |
| 38 |                      |                      | investigators, REC / IRBs, trial participants, trial |
| 39 |                      |                      | registries, journals, regulators)                    |
| 40 |                      |                      |                                                      |
| 41 |                      |                      |                                                      |
| 42 |                      |                      |                                                      |
| 43 | Consent or assent    | <a href="#">#26a</a> | Who will obtain informed consent or assent from      |
| 44 |                      |                      | potential trial participants or authorised           |
| 45 |                      |                      | surrogates, and how (see Item 32)                    |
| 46 |                      |                      |                                                      |
| 47 |                      |                      |                                                      |
| 48 | Consent or assent:   | <a href="#">#26b</a> | Additional consent provisions for collection and     |
| 49 | ancillary studies    |                      | use of participant data and biological specimens     |
| 50 |                      |                      | in ancillary studies, if applicable                  |
| 51 |                      |                      |                                                      |
| 52 |                      |                      |                                                      |
| 53 |                      |                      |                                                      |
| 54 | Confidentiality      | <a href="#">#27</a>  | How personal information about potential and         |
| 55 |                      |                      | enrolled participants will be collected, shared, and |
| 56 |                      |                      | maintained in order to protect confidentiality       |
| 57 |                      |                      | before, during, and after the trial                  |
| 58 |                      |                      |                                                      |
| 59 |                      |                      |                                                      |
| 60 |                      |                      |                                                      |

|    |                       |                      |                                                        |               |
|----|-----------------------|----------------------|--------------------------------------------------------|---------------|
| 1  | Declaration of        | <a href="#">#28</a>  | Financial and other competing interests for            | 17            |
| 2  | interests             |                      | principal investigators for the overall trial and each |               |
| 3  |                       |                      | study site                                             |               |
| 4  |                       |                      |                                                        |               |
| 5  |                       |                      |                                                        |               |
| 6  | Data access           | <a href="#">#29</a>  | Statement of who will have access to the final trial   | 15            |
| 7  |                       |                      | dataset, and disclosure of contractual agreements      |               |
| 8  |                       |                      | that limit such access for investigators               |               |
| 9  |                       |                      |                                                        |               |
| 10 |                       |                      |                                                        |               |
| 11 | Ancillary and post    | <a href="#">#30</a>  | Provisions, if any, for ancillary and post-trial care, | 16            |
| 12 | trial care            |                      | and for compensation to those who suffer harm          |               |
| 13 |                       |                      | from trial participation                               |               |
| 14 |                       |                      |                                                        |               |
| 15 |                       |                      |                                                        |               |
| 16 |                       |                      |                                                        |               |
| 17 | Dissemination policy: | <a href="#">#31a</a> | Plans for investigators and sponsor to                 | 16            |
| 18 | trial results         |                      | communicate trial results to participants,             |               |
| 19 |                       |                      | healthcare professionals, the public, and other        |               |
| 20 |                       |                      | relevant groups (eg, via publication, reporting in     |               |
| 21 |                       |                      | results databases, or other data sharing               |               |
| 22 |                       |                      | arrangements), including any publication               |               |
| 23 |                       |                      | restrictions                                           |               |
| 24 |                       |                      |                                                        |               |
| 25 |                       |                      |                                                        |               |
| 26 |                       |                      |                                                        |               |
| 27 |                       |                      |                                                        |               |
| 28 | Dissemination policy: | <a href="#">#31b</a> | Authorship eligibility guidelines and any intended     | 16            |
| 29 | authorship            |                      | use of professional writers                            |               |
| 30 |                       |                      |                                                        |               |
| 31 |                       |                      |                                                        |               |
| 32 | Dissemination policy: | <a href="#">#31c</a> | Plans, if any, for granting public access to the full  | 15            |
| 33 | reproducible          |                      | protocol, participant-level dataset, and statistical   |               |
| 34 | research              |                      | code                                                   |               |
| 35 |                       |                      |                                                        |               |
| 36 |                       |                      |                                                        |               |
| 37 | <b>Appendices</b>     |                      |                                                        |               |
| 38 |                       |                      |                                                        |               |
| 39 |                       |                      |                                                        |               |
| 40 | Informed consent      | <a href="#">#32</a>  | Model consent form and other related                   | Appendix 2    |
| 41 | materials             |                      | documentation given to participants and                |               |
| 42 |                       |                      | authorised surrogates                                  |               |
| 43 |                       |                      |                                                        |               |
| 44 |                       |                      |                                                        |               |
| 45 | Biological specimens  | <a href="#">#33</a>  | Plans for collection, laboratory evaluation, and       | Appendix 3,   |
| 46 |                       |                      | storage of biological specimens for genetic or         | Supplementary |
| 47 |                       |                      | molecular analysis in the current trial and for        |               |
| 48 |                       |                      | future use in ancillary studies, if applicable         |               |
| 49 |                       |                      |                                                        |               |
| 50 |                       |                      |                                                        |               |
| 51 |                       |                      |                                                        |               |

## Notes:

- 33: Appendix 3, Supplementary The SPIRIT Explanation and Elaboration paper is distributed under the terms of the Creative Commons Attribution License CC-BY-NC. This checklist was completed on 07. July 2023 using <https://www.goodreports.org/>, a tool made by the [EQUATOR Network](#) in collaboration with [Penelope.ai](#)
